# Supplementary material for: Reference Intervals of Central Aortic Blood Pressure and Augmentation Index Assessed with an Oscillometric Device in Healthy Children, Adolescents, and Young Adults from Argentina
Source: Hindawi journal article supplement (doi:10.1155/2018/1469651), 2018-01-01
Supplement: f1 [file 1469651.f1.pdf]

| Table A. Age-related reference intervals (RIs) for central (aortic) systolic blood pressure for the entire population (n=1038) |      |        |      |       |       |       |       |       |       |         |       |
|--------------------------------------------------------------------------------------------------------------------------------|------|--------|------|-------|-------|-------|-------|-------|-------|---------|-------|
| Age (years)                                                                                                                    | 1 th | 2.5 th | 5 th | 10 th | 25 th | 50 th | 75 th | 90 th | 95 th | 97.5 th | 99 th |
| 5.0                                                                                                                            | 77.6 | 79.2   | 80.7 | 82.3  | 85.1  | 88.3  | 91.6  | 94.6  | 96.5  | 98.1    | 100.0 |
| 5.2                                                                                                                            | 77.6 | 79.3   | 80.7 | 82.4  | 85.3  | 88.7  | 92.1  | 95.2  | 97.2  | 98.9    | 100.9 |
| 5.4                                                                                                                            | 77.6 | 79.3   | 80.8 | 82.6  | 85.6  | 89.0  | 92.6  | 95.9  | 97.9  | 99.6    | 101.7 |
| 5.6                                                                                                                            | 77.5 | 79.3   | 80.9 | 82.7  | 85.8  | 89.4  | 93.0  | 96.4  | 98.5  | 100.3   | 102.5 |
| 5.8                                                                                                                            | 77.5 | 79.4   | 81.0 | 82.8  | 86.0  | 89.7  | 93.5  | 97.0  | 99.1  | 101.0   | 103.3 |
| 6.0                                                                                                                            | 77.5 | 79.4   | 81.0 | 83.0  | 86.3  | 90.0  | 93.9  | 97.5  | 99.7  | 101.7   | 104.0 |
| 6.2                                                                                                                            | 77.5 | 79.4   | 81.1 | 83.1  | 86.5  | 90.3  | 94.4  | 98.1  | 100.3 | 102.3   | 104.7 |
| 6.4                                                                                                                            | 77.5 | 79.5   | 81.2 | 83.2  | 86.7  | 90.6  | 94.8  | 98.6  | 100.9 | 102.9   | 105.4 |
| 6.6                                                                                                                            | 77.5 | 79.5   | 81.3 | 83.3  | 86.9  | 90.9  | 95.1  | 99.0  | 101.4 | 103.5   | 106.0 |
| 6.8                                                                                                                            | 77.5 | 79.6   | 81.4 | 83.5  | 87.1  | 91.2  | 95.5  | 99.5  | 101.9 | 104.1   | 106.6 |
| 7.0                                                                                                                            | 77.5 | 79.6   | 81.5 | 83.6  | 87.3  | 91.5  | 95.9  | 99.9  | 102.4 | 104.6   | 107.2 |
| 7.2                                                                                                                            | 77.6 | 79.7   | 81.5 | 83.7  | 87.5  | 91.8  | 96.2  | 100.4 | 102.9 | 105.2   | 107.8 |
| 7.4                                                                                                                            | 77.6 | 79.7   | 81.6 | 83.8  | 87.6  | 92.0  | 96.6  | 100.8 | 103.4 | 105.7   | 108.4 |
| 7.6                                                                                                                            | 77.6 | 79.8   | 81.7 | 84.0  | 87.8  | 92.3  | 96.9  | 101.2 | 103.8 | 106.2   | 108.9 |
| 7.8                                                                                                                            | 77.6 | 79.9   | 81.8 | 84.1  | 88.0  | 92.5  | 97.2  | 101.6 | 104.3 | 106.6   | 109.4 |
| 8.0                                                                                                                            | 77.7 | 79.9   | 81.9 | 84.2  | 88.2  | 92.8  | 97.5  | 102.0 | 104.7 | 107.1   | 109.9 |
| 8.2                                                                                                                            | 77.7 | 80.0   | 82.0 | 84.3  | 88.4  | 93.0  | 97.8  | 102.3 | 105.1 | 107.5   | 110.4 |
| 8.4                                                                                                                            | 77.8 | 80.1   | 82.1 | 84.5  | 88.5  | 93.2  | 98.1  | 102.7 | 105.5 | 107.9   | 110.9 |
| 8.6                                                                                                                            | 77.8 | 80.1   | 82.2 | 84.6  | 88.7  | 93.5  | 98.4  | 103.0 | 105.9 | 108.4   | 111.3 |
| 8.8                                                                                                                            | 77.9 | 80.2   | 82.3 | 84.7  | 88.9  | 93.7  | 98.7  | 103.3 | 106.2 | 108.7   | 111.8 |
| 9.0                                                                                                                            | 77.9 | 80.3   | 82.4 | 84.8  | 89.0  | 93.9  | 99.0  | 103.7 | 106.6 | 109.1   | 112.2 |
| 9.2                                                                                                                            | 78.0 | 80.4   | 82.5 | 84.9  | 89.2  | 94.1  | 99.2  | 104.0 | 106.9 | 109.5   | 112.6 |
| 9.4                                                                                                                            | 78.0 | 80.5   | 82.6 | 85.1  | 89.4  | 94.3  | 99.5  | 104.3 | 107.2 | 109.9   | 113.0 |
| 9.6                                                                                                                            | 78.1 | 80.5   | 82.7 | 85.2  | 89.5  | 94.5  | 99.7  | 104.6 | 107.6 | 110.2   | 113.3 |
| 9.8                                                                                                                            | 78.2 | 80.6   | 82.8 | 85.3  | 89.7  | 94.7  | 100.0 | 104.8 | 107.9 | 110.5   | 113.7 |
| 10.0                                                                                                                           | 78.2 | 80.7   | 82.9 | 85.4  | 89.8  | 94.9  | 100.2 | 105.1 | 108.2 | 110.8   | 114.0 |
| 10.2                                                                                                                           | 78.3 | 80.8   | 83.0 | 85.5  | 90.0  | 95.1  | 100.4 | 105.4 | 108.4 | 111.2   | 114.4 |
| 10.4                                                                                                                           | 78.4 | 80.9   | 83.1 | 85.7  | 90.1  | 95.3  | 100.6 | 105.6 | 108.7 | 111.5   | 114.7 |
| 10.6                                                                                                                           | 78.5 | 81.0   | 83.2 | 85.8  | 90.3  | 95.4  | 100.9 | 105.9 | 109.0 | 111.7   | 115.0 |
| 10.8                                                                                                                           | 78.5 | 81.1   | 83.3 | 85.9  | 90.4  | 95.6  | 101.1 | 106.1 | 109.3 | 112.0   | 115.3 |
| 11.0                                                                                                                           | 78.6 | 81.2   | 83.4 | 86.0  | 90.5  | 95.8  | 101.3 | 106.4 | 109.5 | 112.3   | 115.6 |
| 11.2                                                                                                                           | 78.7 | 81.2   | 83.5 | 86.1  | 90.7  | 96.0  | 101.5 | 106.6 | 109.8 | 112.6   | 115.9 |
| 11.4                                                                                                                           | 78.8 | 81.3   | 83.6 | 86.3  | 90.8  | 96.1  | 101.7 | 106.8 | 110.0 | 112.8   | 116.2 |
| 11.6                                                                                                                           | 78.9 | 81.4   | 83.7 | 86.4  | 91.0  | 96.3  | 101.8 | 107.0 | 110.2 | 113.1   | 116.4 |
| 11.8                                                                                                                           | 78.9 | 81.5   | 83.8 | 86.5  | 91.1  | 96.5  | 102.0 | 107.2 | 110.5 | 113.3   | 116.7 |
| 12.0                                                                                                                           | 79.0 | 81.6   | 83.9 | 86.6  | 91.2  | 96.6  | 102.2 | 107.4 | 110.7 | 113.5   | 116.9 |
| 12.2                                                                                                                           | 79.1 | 81.7   | 84.0 | 86.7  | 91.4  | 96.8  | 102.4 | 107.6 | 110.9 | 113.7   | 117.2 |
| 12.4                                                                                                                           | 79.2 | 81.8   | 84.1 | 86.8  | 91.5  | 96.9  | 102.6 | 107.8 | 111.1 | 114.0   | 117.4 |
| 12.6                                                                                                                           | 79.3 | 81.9   | 84.2 | 87.0  | 91.6  | 97.1  | 102.7 | 108.0 | 111.3 | 114.2   | 117.6 |
| 12.8                                                                                                                           | 79.4 | 82.0   | 84.3 | 87.1  | 91.8  | 97.2  | 102.9 | 108.2 | 111.5 | 114.4   | 117.8 |
| 13.0                                                                                                                           | 79.5 | 82.1   | 84.5 | 87.2  | 91.9  | 97.4  | 103.1 | 108.4 | 111.7 | 114.6   | 118.0 |
| 13.2                                                                                                                           | 79.6 | 82.2   | 84.6 | 87.3  | 92.0  | 97.5  | 103.2 | 108.5 | 111.8 | 114.7   | 118.2 |
| 13.4                                                                                                                           | 79.7 | 82.3   | 84.7 | 87.4  | 92.1  | 97.6  | 103.4 | 108.7 | 112.0 | 114.9   | 118.4 |
| 13.6                                                                                                                           | 79.8 | 82.5   | 84.8 | 87.5  | 92.3  | 97.8  | 103.5 | 108.9 | 112.2 | 115.1   | 118.6 |
| 13.8                                                                                                                           | 79.9 | 82.6   | 84.9 | 87.7  | 92.4  | 97.9  | 103.7 | 109.0 | 112.3 | 115.3   | 118.8 |
| 14.0                                                                                                                           | 80.0 | 82.7   | 85.0 | 87.8  | 92.5  | 98.0  | 103.8 | 109.2 | 112.5 | 115.4   | 118.9 |
| 14.2                                                                                                                           | 80.1 | 82.8   | 85.1 | 87.9  | 92.6  | 98.2  | 103.9 | 109.3 | 112.6 | 115.6   | 119.1 |
| 14.4                                                                                                                           | 80.2 | 82.9   | 85.2 | 88.0  | 92.8  | 98.3  | 104.1 | 109.5 | 112.8 | 115.7   | 119.2 |
| 14.6                                                                                                                           | 80.3 | 83.0   | 85.3 | 88.1  | 92.9  | 98.4  | 104.2 | 109.6 | 112.9 | 115.9   | 119.4 |
| 14.8                                                                                                                           | 80.4 | 83.1   | 85.5 | 88.2  | 93.0  | 98.5  | 104.3 | 109.7 | 113.1 | 116.0   | 119.5 |
| 15.0                                                                                                                           | 80.5 | 83.2   | 85.6 | 88.3  | 93.1  | 98.7  | 104.5 | 109.9 | 113.2 | 116.2   | 119.7 |
| 15.2                                                                                                                           | 80.7 | 83.3   | 85.7 | 88.5  | 93.2  | 98.8  | 104.6 | 110.0 | 113.3 | 116.3   | 119.8 |
| 15.4                                                                                                                           | 80.8 | 83.4   | 85.8 | 88.6  | 93.4  | 98.9  | 104.7 | 110.1 | 113.4 | 116.4   | 119.9 |
| 15.6                                                                                                                           | 80.9 | 83.6   | 85.9 | 88.7  | 93.5  | 99.0  | 104.8 | 110.2 | 113.6 | 116.5   | 120.0 |
| 15.8                                                                                                                           | 81.0 | 83.7   | 86.0 | 88.8  | 93.6  | 99.1  | 104.9 | 110.3 | 113.7 | 116.6   | 120.1 |
| 16.0                                                                                                                           | 81.1 | 83.8   | 86.1 | 88.9  | 93.7  | 99.3  | 105.1 | 110.5 | 113.8 | 116.7   | 120.3 |
| 16.2                                                                                                                           | 81.2 | 83.9   | 86.3 | 89.0  | 93.8  | 99.4  | 105.2 | 110.6 | 113.9 | 116.9   | 120.4 |
| 16.4                                                                                                                           | 81.3 | 84.0   | 86.4 | 89.2  | 93.9  | 99.5  | 105.3 | 110.7 | 114.0 | 117.0   | 120.5 |
| 16.6                                                                                                                           | 81.5 | 84.1   | 86.5 | 89.3  | 94.0  | 99.6  | 105.4 | 110.8 | 114.1 | 117.1   | 120.6 |
| 16.8                                                                                                                           | 81.6 | 84.3   | 86.6 | 89.4  | 94.2  | 99.7  | 105.5 | 110.9 | 114.2 | 117.1   | 120.6 |
| 17.0                                                                                                                           | 81.7 | 84.4   | 86.7 | 89.5  | 94.3  | 99.8  | 105.6 | 111.0 | 114.3 | 117.2   | 120.7 |
| 17.2                                                                                                                           | 81.8 | 84.5   | 86.8 | 89.6  | 94.4  | 99.9  | 105.7 | 111.1 | 114.4 | 117.3   | 120.8 |
| 17.4                                                                                                                           | 81.9 | 84.6   | 87.0 | 89.7  | 94.5  | 100.0 | 105.8 | 111.1 | 114.5 | 117.4   | 120.9 |
| 17.6                                                                                                                           | 82.1 | 84.7   | 87.1 | 89.8  | 94.6  | 100.1 | 105.9 | 111.2 | 114.5 | 117.5   | 120.9 |
| 17.8                                                                                                                           | 82.2 | 84.9   | 87.2 | 90.0  | 94.7  | 100.2 | 106.0 | 111.3 | 114.6 | 117.5   | 121.0 |
| 18.0                                                                                                                           | 82.3 | 85.0   | 87.3 | 90.1  | 94.8  | 100.3 | 106.0 | 111.4 | 114.7 | 117.6   | 121.1 |
| 18.2                                                                                                                           | 82.4 | 85.1   | 87.4 | 90.2  | 94.9  | 100.4 | 106.1 | 111.5 | 114.8 | 117.7   | 121.1 |
| 18.4                                                                                                                           | 82.6 | 85.2   | 87.6 | 90.3  | 95.0  | 100.5 | 106.2 | 111.5 | 114.8 | 117.7   | 121.2 |
| 18.6                                                                                                                           | 82.7 | 85.3   | 87.7 | 90.4  | 95.1  | 100.6 | 106.3 | 111.6 | 114.9 | 117.8   | 121.2 |
| 18.8                                                                                                                           | 82.8 | 85.5   | 87.8 | 90.5  | 95.2  | 100.7 | 106.4 | 111.7 | 115.0 | 117.9   | 121.3 |
| 19.0                                                                                                                           | 83.0 | 85.6   | 87.9 | 90.6  | 95.3  | 100.8 | 106.5 | 111.8 | 115.0 | 117.9   | 121.3 |
| 19.2                                                                                                                           | 83.1 | 85.7   | 88.0 | 90.8  | 95.5  | 100.9 | 106.5 | 111.8 | 115.1 | 118.0   | 121.4 |
| 19.4                                                                                                                           | 83.2 | 85.8   | 88.2 | 90.9  | 95.6  | 101.0 | 106.6 | 111.9 | 115.1 | 118.0   | 121.4 |
| 19.6                                                                                                                           | 83.3 | 86.0   | 88.3 | 91.0  | 95.7  | 101.1 | 106.7 | 111.9 | 115.2 | 118.0   | 121.4 |
| 19.8                                                                                                                           | 83.5 | 86.1   | 88.4 | 91.1  | 95.8  | 101.2 | 106.8 | 112.0 | 115.2 | 118.1   | 121.5 |
| 20.0                                                                                                                           | 83.6 | 86.2   | 88.5 | 91.2  | 95.9  | 101.2 | 106.8 | 112.1 | 115.3 | 118.1   | 121.5 |
| 20.2                                                                                                                           | 83.7 | 86.4   | 88.6 | 91.3  | 96.0  | 101.3 | 106.9 | 112.1 | 115.3 | 118.1   | 121.5 |
| 20.4                                                                                                                           | 83.9 | 86.5   | 88.8 | 91.5  | 96.1  | 101.4 | 107.0 | 112.2 | 115.4 | 118.2   | 121.5 |
| 20.6                                                                                                                           | 84.0 | 86.6   | 88.9 | 91.6  | 96.2  | 101.5 | 107.0 | 112.2 | 115.4 | 118.2   | 121.5 |
| 20.8                                                                                                                           | 84.2 | 86.7   | 89.0 | 91.7  | 96.3  | 101.6 | 107.1 | 112.3 | 115.4 | 118.2   | 121.5 |
| 21.0                                                                                                                           | 84.3 | 86.9   | 89.1 | 91.8  | 96.4  | 101.7 | 107.2 | 112.3 | 115.5 | 118.2   | 121.6 |
| 21.2                                                                                                                           | 84.4 | 87.0   | 89.3 | 91.9  | 96.5  | 101.7 | 107.2 | 112.3 | 115.5 | 118.3   | 121.6 |
| 21.4                                                                                                                           | 84.6 | 87.1   | 89.4 | 92.0  | 96.6  | 101.8 | 107.3 | 112.4 | 115.5 | 118.3   | 121.6 |
| 21.6                                                                                                                           | 84.7 | 87.3   | 89.5 | 92.1  | 96.7  | 101.9 | 107.3 | 112.4 | 115.5 | 118.3   | 121.6 |
| 21.8                                                                                                                           | 84.8 | 87.4   | 89.6 | 92.3  | 96.8  | 102.0 | 107.4 | 112.5 | 115.6 | 118.3   | 121.6 |

**Table B. Age-related reference intervals (RIs) for central (aortic) systolic blood pressure for males (n=576)**

| Age (years) | 1 th | 2.5 th | 5 th | 10 th | 25 th | 50 th | 75 th | 90 th | 95 th | 97.5 th | 99 th |
|-------------|------|--------|------|-------|-------|-------|-------|-------|-------|---------|-------|
| 5.0         | 76.4 | 78.4   | 80.1 | 82.1  | 85.3  | 89.0  | 92.5  | 95.8  | 97.7  | 99.3    | 101.2 |
| 5.2         | 76.2 | 78.2   | 80.0 | 82.0  | 85.4  | 89.2  | 92.9  | 96.2  | 98.2  | 99.9    | 101.9 |
| 5.4         | 75.9 | 78.1   | 79.9 | 82.0  | 85.5  | 89.4  | 93.3  | 96.7  | 98.8  | 100.5   | 102.6 |
| 5.6         | 75.7 | 77.9   | 79.8 | 82.0  | 85.6  | 89.6  | 93.6  | 97.1  | 99.3  | 101.1   | 103.2 |
| 5.8         | 75.5 | 77.8   | 79.8 | 82.0  | 85.7  | 89.8  | 93.9  | 97.6  | 99.8  | 101.6   | 103.8 |
| 6.0         | 75.4 | 77.7   | 79.7 | 82.0  | 85.8  | 90.0  | 94.2  | 98.0  | 100.2 | 102.2   | 104.4 |
| 6.2         | 75.2 | 77.6   | 79.7 | 82.0  | 85.9  | 90.3  | 94.6  | 98.4  | 100.7 | 102.7   | 105.0 |
| 6.4         | 75.1 | 77.5   | 79.6 | 82.0  | 86.0  | 90.5  | 94.9  | 98.8  | 101.1 | 103.2   | 105.5 |
| 6.6         | 75.0 | 77.5   | 79.6 | 82.1  | 86.2  | 90.7  | 95.2  | 99.2  | 101.6 | 103.6   | 106.0 |
| 6.8         | 74.9 | 77.4   | 79.6 | 82.1  | 86.3  | 90.9  | 95.5  | 99.5  | 102.0 | 104.1   | 106.5 |
| 7.0         | 74.8 | 77.4   | 79.6 | 82.2  | 86.4  | 91.1  | 95.7  | 99.9  | 102.4 | 104.5   | 107.0 |
| 7.2         | 74.8 | 77.4   | 79.7 | 82.3  | 86.5  | 91.3  | 96.0  | 100.2 | 102.8 | 104.9   | 107.5 |
| 7.4         | 74.7 | 77.4   | 79.7 | 82.3  | 86.7  | 91.5  | 96.3  | 100.6 | 103.1 | 105.3   | 107.9 |
| 7.6         | 74.7 | 77.4   | 79.7 | 82.4  | 86.8  | 91.7  | 96.6  | 100.9 | 103.5 | 105.7   | 108.3 |
| 7.8         | 74.7 | 77.4   | 79.8 | 82.5  | 87.0  | 91.9  | 96.8  | 101.2 | 103.9 | 106.1   | 108.7 |
| 8.0         | 74.7 | 77.5   | 79.8 | 82.6  | 87.1  | 92.1  | 97.1  | 101.5 | 104.2 | 106.5   | 109.1 |
| 8.2         | 74.7 | 77.5   | 79.9 | 82.7  | 87.3  | 92.3  | 97.4  | 101.9 | 104.5 | 106.8   | 109.5 |
| 8.4         | 74.7 | 77.6   | 80.0 | 82.8  | 87.4  | 92.5  | 97.6  | 102.2 | 104.9 | 107.2   | 109.9 |
| 8.6         | 74.7 | 77.6   | 80.1 | 82.9  | 87.6  | 92.7  | 97.9  | 102.4 | 105.2 | 107.5   | 110.3 |
| 8.8         | 74.8 | 77.7   | 80.2 | 83.0  | 87.7  | 92.9  | 98.1  | 102.7 | 105.5 | 107.9   | 110.6 |
| 9.0         | 74.8 | 77.8   | 80.3 | 83.1  | 87.9  | 93.1  | 98.4  | 103.0 | 105.8 | 108.2   | 111.0 |
| 9.2         | 74.9 | 77.8   | 80.4 | 83.2  | 88.0  | 93.3  | 98.6  | 103.3 | 106.1 | 108.5   | 111.3 |
| 9.4         | 75.0 | 77.9   | 80.5 | 83.4  | 88.2  | 93.5  | 98.8  | 103.6 | 106.4 | 108.8   | 111.6 |
| 9.6         | 75.0 | 78.0   | 80.6 | 83.5  | 88.4  | 93.7  | 99.1  | 103.8 | 106.7 | 109.1   | 111.9 |
| 9.8         | 75.1 | 78.1   | 80.7 | 83.6  | 88.5  | 93.9  | 99.3  | 104.1 | 106.9 | 109.4   | 112.3 |
| 10.0        | 75.2 | 78.2   | 80.8 | 83.8  | 88.7  | 94.1  | 99.5  | 104.3 | 107.2 | 109.7   | 112.6 |
| 10.2        | 75.3 | 78.4   | 81.0 | 83.9  | 88.9  | 94.3  | 99.7  | 104.6 | 107.5 | 110.0   | 112.8 |
| 10.4        | 75.4 | 78.5   | 81.1 | 84.1  | 89.0  | 94.5  | 100.0 | 104.8 | 107.7 | 110.2   | 113.1 |
| 10.6        | 75.5 | 78.6   | 81.2 | 84.2  | 89.2  | 94.7  | 100.2 | 105.1 | 108.0 | 110.5   | 113.4 |
| 10.8        | 75.7 | 78.7   | 81.4 | 84.4  | 89.4  | 94.9  | 100.4 | 105.3 | 108.2 | 110.7   | 113.7 |
| 11.0        | 75.8 | 78.9   | 81.5 | 84.5  | 89.6  | 95.1  | 100.6 | 105.5 | 108.5 | 111.0   | 113.9 |
| 11.2        | 75.9 | 79.0   | 81.7 | 84.7  | 89.7  | 95.3  | 100.8 | 105.8 | 108.7 | 111.2   | 114.2 |
| 11.4        | 76.1 | 79.2   | 81.8 | 84.9  | 89.9  | 95.5  | 101.0 | 106.0 | 108.9 | 111.5   | 114.4 |
| 11.6        | 76.2 | 79.3   | 82.0 | 85.0  | 90.1  | 95.7  | 101.3 | 106.2 | 109.2 | 111.7   | 114.7 |
| 11.8        | 76.4 | 79.5   | 82.2 | 85.2  | 90.3  | 95.9  | 101.5 | 106.4 | 109.4 | 111.9   | 114.9 |
| 12.0        | 76.5 | 79.6   | 82.3 | 85.4  | 90.5  | 96.1  | 101.7 | 106.6 | 109.6 | 112.2   | 115.1 |
| 12.2        | 76.7 | 79.8   | 82.5 | 85.6  | 90.6  | 96.3  | 101.9 | 106.8 | 109.8 | 112.4   | 115.4 |
| 12.4        | 76.9 | 80.0   | 82.7 | 85.7  | 90.8  | 96.5  | 102.1 | 107.0 | 110.0 | 112.6   | 115.6 |
| 12.6        | 77.0 | 80.2   | 82.8 | 85.9  | 91.0  | 96.7  | 102.3 | 107.3 | 110.2 | 112.8   | 115.8 |
| 12.8        | 77.2 | 80.3   | 83.0 | 86.1  | 91.2  | 96.9  | 102.5 | 107.5 | 110.4 | 113.0   | 116.0 |
| 13.0        | 77.4 | 80.5   | 83.2 | 86.3  | 91.4  | 97.0  | 102.7 | 107.6 | 110.6 | 113.2   | 116.2 |
| 13.2        | 77.6 | 80.7   | 83.4 | 86.5  | 91.6  | 97.2  | 102.8 | 107.8 | 110.8 | 113.4   | 116.4 |
| 13.4        | 77.8 | 80.9   | 83.6 | 86.7  | 91.8  | 97.4  | 103.0 | 108.0 | 111.0 | 113.6   | 116.6 |
| 13.6        | 78.0 | 81.1   | 83.8 | 86.9  | 92.0  | 97.6  | 103.2 | 108.2 | 111.2 | 113.8   | 116.8 |
| 13.8        | 78.2 | 81.3   | 84.0 | 87.1  | 92.2  | 97.8  | 103.4 | 108.4 | 111.4 | 114.0   | 117.0 |
| 14.0        | 78.4 | 81.5   | 84.2 | 87.3  | 92.4  | 98.0  | 103.6 | 108.6 | 111.6 | 114.2   | 117.1 |
| 14.2        | 78.6 | 81.7   | 84.4 | 87.4  | 92.5  | 98.2  | 103.8 | 108.8 | 111.8 | 114.3   | 117.3 |
| 14.4        | 78.8 | 81.9   | 84.6 | 87.6  | 92.7  | 98.4  | 104.0 | 109.0 | 111.9 | 114.5   | 117.5 |
| 14.6        | 79.0 | 82.1   | 84.8 | 87.9  | 92.9  | 98.6  | 104.2 | 109.1 | 112.1 | 114.7   | 117.7 |
| 14.8        | 79.2 | 82.3   | 85.0 | 88.1  | 93.1  | 98.8  | 104.3 | 109.3 | 112.3 | 114.8   | 117.8 |
| 15.0        | 79.4 | 82.5   | 85.2 | 88.3  | 93.3  | 98.9  | 104.5 | 109.5 | 112.4 | 115.0   | 118.0 |
| 15.2        | 79.6 | 82.8   | 85.4 | 88.5  | 93.5  | 99.1  | 104.7 | 109.7 | 112.6 | 115.2   | 118.1 |
| 15.4        | 79.9 | 83.0   | 85.6 | 88.7  | 93.7  | 99.3  | 104.9 | 109.8 | 112.8 | 115.3   | 118.3 |
| 15.6        | 80.1 | 83.2   | 85.8 | 88.9  | 93.9  | 99.5  | 105.0 | 110.0 | 112.9 | 115.5   | 118.4 |
| 15.8        | 80.3 | 83.4   | 86.1 | 89.1  | 94.1  | 99.7  | 105.2 | 110.2 | 113.1 | 115.6   | 118.6 |
| 16.0        | 80.6 | 83.6   | 86.3 | 89.3  | 94.3  | 99.9  | 105.4 | 110.3 | 113.2 | 115.8   | 118.7 |
| 16.2        | 80.8 | 83.9   | 86.5 | 89.5  | 94.5  | 100.1 | 105.6 | 110.5 | 113.4 | 115.9   | 118.9 |
| 16.4        | 81.0 | 84.1   | 86.7 | 89.7  | 94.7  | 100.3 | 105.7 | 110.6 | 113.6 | 116.1   | 119.0 |
| 16.6        | 81.3 | 84.3   | 87.0 | 90.0  | 94.9  | 100.4 | 105.9 | 110.8 | 113.7 | 116.2   | 119.1 |
| 16.8        | 81.5 | 84.6   | 87.2 | 90.2  | 95.1  | 100.6 | 106.1 | 110.9 | 113.9 | 116.4   | 119.3 |
| 17.0        | 81.8 | 84.8   | 87.4 | 90.4  | 95.3  | 100.8 | 106.3 | 111.1 | 114.0 | 116.5   | 119.4 |
| 17.2        | 82.0 | 85.1   | 87.6 | 90.6  | 95.5  | 101.0 | 106.4 | 111.3 | 114.1 | 116.6   | 119.5 |
| 17.4        | 82.3 | 85.3   | 87.9 | 90.8  | 95.8  | 101.2 | 106.6 | 111.4 | 114.3 | 116.8   | 119.6 |
| 17.6        | 82.5 | 85.5   | 88.1 | 91.1  | 96.0  | 101.4 | 106.8 | 111.6 | 114.4 | 116.9   | 119.8 |
| 17.8        | 82.8 | 85.8   | 88.4 | 91.3  | 96.2  | 101.6 | 106.9 | 111.7 | 114.6 | 117.0   | 119.9 |
| 18.0        | 83.1 | 86.0   | 88.6 | 91.5  | 96.4  | 101.7 | 107.1 | 111.9 | 114.7 | 117.1   | 120.0 |
| 18.2        | 83.3 | 86.3   | 88.8 | 91.7  | 96.6  | 101.9 | 107.3 | 112.0 | 114.8 | 117.3   | 120.1 |
| 18.4        | 83.6 | 86.5   | 89.1 | 92.0  | 96.8  | 102.1 | 107.4 | 112.1 | 115.0 | 117.4   | 120.2 |
| 18.6        | 83.9 | 86.8   | 89.3 | 92.2  | 97.0  | 102.3 | 107.6 | 112.3 | 115.1 | 117.5   | 120.3 |
| 18.8        | 84.1 | 87.0   | 89.6 | 92.4  | 97.2  | 102.5 | 107.7 | 112.4 | 115.2 | 117.6   | 120.4 |
| 19.0        | 84.4 | 87.3   | 89.8 | 92.7  | 97.4  | 102.7 | 107.9 | 112.6 | 115.3 | 117.7   | 120.5 |
| 19.2        | 84.7 | 87.6   | 90.0 | 92.9  | 97.6  | 102.9 | 108.1 | 112.7 | 115.5 | 117.9   | 120.6 |
| 19.4        | 84.9 | 87.8   | 90.3 | 93.1  | 97.8  | 103.0 | 108.2 | 112.8 | 115.6 | 118.0   | 120.7 |
| 19.6        | 85.2 | 88.1   | 90.5 | 93.4  | 98.0  | 103.2 | 108.4 | 113.0 | 115.7 | 118.1   | 120.8 |
| 19.8        | 85.5 | 88.3   | 90.8 | 93.6  | 98.3  | 103.4 | 108.5 | 113.1 | 115.8 | 118.2   | 120.9 |
| 20.0        | 85.8 | 88.6   | 91.0 | 93.8  | 98.5  | 103.6 | 108.7 | 113.2 | 116.0 | 118.3   | 121.0 |
| 20.2        | 86.1 | 88.9   | 91.3 | 94.1  | 98.7  | 103.8 | 108.8 | 113.4 | 116.1 | 118.4   | 121.1 |
| 20.4        | 86.3 | 89.1   | 91.5 | 94.3  | 98.9  | 104.0 | 109.0 | 113.5 | 116.2 | 118.5   | 121.2 |
| 20.6        | 86.6 | 89.4   | 91.8 | 94.5  | 99.1  | 104.1 | 109.2 | 113.6 | 116.3 | 118.6   | 121.3 |
| 20.8        | 86.9 | 89.7   | 92.1 | 94.8  | 99.3  | 104.3 | 109.3 | 113.8 | 116.4 | 118.7   | 121.4 |
| 21.0        | 87.2 | 90.0   | 92.3 | 95.0  | 99.5  | 104.5 | 109.5 | 113.9 | 116.5 | 118.8   | 121.5 |
| 21.2        | 87.5 | 90.2   | 92.6 | 95.3  | 99.7  | 104.7 | 109.6 | 114.0 | 116.6 | 118.9   | 121.5 |
| 21.4        | 87.8 | 90.5   | 92.8 | 95.5  | 100.0 | 104.9 | 109.8 | 114.1 | 116.7 | 119.0   | 121.6 |
| 21.6        | 88.1 | 90.8   | 93.1 | 95.8  | 100.2 | 105.1 | 109.9 | 114.3 | 116.9 | 119.1   | 121.7 |

**Table C. Age-related reference intervals (RIs) for central (aortic) systolic blood pressure for females (n=462)**

| Age (years) | 1 th | 2.5 th | 5 th | 10 th | 25 th | 50 th | 75 th | 90 th | 95 th | 97.5 th | 99 th |
|-------------|------|--------|------|-------|-------|-------|-------|-------|-------|---------|-------|
| 5.2         | 79.5 | 80.8   | 82.0 | 83.4  | 85.7  | 88.3  | 91.0  | 93.5  | 95.0  | 96.3    | 97.9  |
| 5.4         | 79.4 | 80.8   | 82.1 | 83.5  | 86.0  | 88.8  | 91.7  | 94.3  | 95.9  | 97.3    | 99.0  |
| 5.6         | 79.3 | 80.8   | 82.1 | 83.7  | 86.3  | 89.2  | 92.3  | 95.0  | 96.7  | 98.2    | 100.0 |
| 5.8         | 79.3 | 80.9   | 82.2 | 83.8  | 86.5  | 89.6  | 92.8  | 95.8  | 97.5  | 99.1    | 101.0 |
| 6.0         | 79.2 | 80.9   | 82.3 | 84.0  | 86.8  | 90.0  | 93.4  | 96.4  | 98.3  | 100.0   | 101.9 |
| 6.2         | 79.2 | 80.9   | 82.4 | 84.1  | 87.0  | 90.4  | 93.9  | 97.1  | 99.1  | 100.8   | 102.8 |
| 6.4         | 79.1 | 80.9   | 82.4 | 84.2  | 87.3  | 90.8  | 94.4  | 97.7  | 99.8  | 101.6   | 103.7 |
| 6.6         | 79.1 | 80.9   | 82.5 | 84.4  | 87.5  | 91.2  | 94.9  | 98.3  | 100.4 | 102.3   | 104.5 |
| 6.8         | 79.1 | 80.9   | 82.6 | 84.5  | 87.7  | 91.5  | 95.4  | 98.9  | 101.1 | 103.0   | 105.3 |
| 7.0         | 79.1 | 81.0   | 82.6 | 84.6  | 88.0  | 91.8  | 95.8  | 99.5  | 101.7 | 103.7   | 106.0 |
| 7.2         | 79.0 | 81.0   | 82.7 | 84.7  | 88.2  | 92.1  | 96.2  | 100.0 | 102.3 | 104.4   | 106.8 |
| 7.4         | 79.0 | 81.0   | 82.8 | 84.8  | 88.4  | 92.4  | 96.6  | 100.5 | 102.9 | 105.0   | 107.5 |
| 7.6         | 79.0 | 81.1   | 82.9 | 85.0  | 88.6  | 92.7  | 97.0  | 101.0 | 103.4 | 105.6   | 108.1 |
| 7.8         | 79.0 | 81.1   | 82.9 | 85.1  | 88.8  | 93.0  | 97.4  | 101.5 | 104.0 | 106.2   | 108.8 |
| 8.0         | 79.0 | 81.1   | 83.0 | 85.2  | 88.9  | 93.3  | 97.8  | 101.9 | 104.5 | 106.7   | 109.4 |
| 8.2         | 79.0 | 81.2   | 83.1 | 85.3  | 89.1  | 93.5  | 98.1  | 102.3 | 105.0 | 107.3   | 110.0 |
| 8.4         | 79.0 | 81.2   | 83.1 | 85.4  | 89.3  | 93.8  | 98.4  | 102.8 | 105.4 | 107.8   | 110.5 |
| 8.6         | 79.0 | 81.2   | 83.2 | 85.5  | 89.5  | 94.0  | 98.8  | 103.2 | 105.9 | 108.3   | 111.1 |
| 8.8         | 79.0 | 81.3   | 83.3 | 85.6  | 89.6  | 94.3  | 99.1  | 103.5 | 106.3 | 108.7   | 111.6 |
| 9.0         | 79.0 | 81.3   | 83.3 | 85.7  | 89.8  | 94.5  | 99.4  | 103.9 | 106.7 | 109.2   | 112.1 |
| 9.2         | 79.0 | 81.3   | 83.4 | 85.8  | 89.9  | 94.7  | 99.6  | 104.3 | 107.1 | 109.6   | 112.6 |
| 9.4         | 79.0 | 81.4   | 83.5 | 85.9  | 90.1  | 94.9  | 99.9  | 104.6 | 107.5 | 110.0   | 113.0 |
| 9.6         | 79.0 | 81.4   | 83.5 | 86.0  | 90.2  | 95.1  | 100.2 | 104.9 | 107.8 | 110.4   | 113.5 |
| 9.8         | 79.1 | 81.5   | 83.6 | 86.1  | 90.3  | 95.3  | 100.4 | 105.2 | 108.2 | 110.8   | 113.9 |
| 10.0        | 79.1 | 81.5   | 83.7 | 86.2  | 90.5  | 95.5  | 100.7 | 105.5 | 108.5 | 111.1   | 114.3 |
| 10.2        | 79.1 | 81.6   | 83.7 | 86.3  | 90.6  | 95.7  | 100.9 | 105.8 | 108.8 | 111.5   | 114.7 |
| 10.4        | 79.1 | 81.6   | 83.8 | 86.3  | 90.7  | 95.8  | 101.1 | 106.1 | 109.1 | 111.8   | 115.0 |
| 10.6        | 79.2 | 81.7   | 83.8 | 86.4  | 90.9  | 96.0  | 101.4 | 106.3 | 109.4 | 112.1   | 115.4 |
| 10.8        | 79.2 | 81.7   | 83.9 | 86.5  | 91.0  | 96.2  | 101.6 | 106.6 | 109.7 | 112.4   | 115.7 |
| 11.0        | 79.2 | 81.7   | 84.0 | 86.6  | 91.1  | 96.3  | 101.8 | 106.8 | 110.0 | 112.7   | 116.0 |
| 11.2        | 79.2 | 81.8   | 84.0 | 86.7  | 91.2  | 96.5  | 102.0 | 107.1 | 110.2 | 113.0   | 116.3 |
| 11.4        | 79.3 | 81.8   | 84.1 | 86.8  | 91.3  | 96.6  | 102.1 | 107.3 | 110.5 | 113.3   | 116.6 |
| 11.6        | 79.3 | 81.9   | 84.2 | 86.8  | 91.4  | 96.8  | 102.3 | 107.5 | 110.7 | 113.5   | 116.9 |
| 11.8        | 79.4 | 81.9   | 84.2 | 86.9  | 91.5  | 96.9  | 102.5 | 107.7 | 110.9 | 113.8   | 117.1 |
| 12.0        | 79.4 | 82.0   | 84.3 | 87.0  | 91.6  | 97.0  | 102.6 | 107.9 | 111.1 | 114.0   | 117.4 |
| 12.2        | 79.4 | 82.0   | 84.4 | 87.1  | 91.7  | 97.1  | 102.8 | 108.1 | 111.3 | 114.2   | 117.6 |
| 12.4        | 79.5 | 82.1   | 84.4 | 87.1  | 91.8  | 97.3  | 102.9 | 108.2 | 111.5 | 114.4   | 117.9 |
| 12.6        | 79.5 | 82.2   | 84.5 | 87.2  | 91.9  | 97.4  | 103.1 | 108.4 | 111.7 | 114.6   | 118.1 |
| 12.8        | 79.6 | 82.2   | 84.5 | 87.3  | 92.0  | 97.5  | 103.2 | 108.6 | 111.9 | 114.8   | 118.3 |
| 13.0        | 79.6 | 82.3   | 84.6 | 87.4  | 92.1  | 97.6  | 103.4 | 108.7 | 112.0 | 115.0   | 118.5 |
| 13.2        | 79.7 | 82.3   | 84.7 | 87.4  | 92.2  | 97.7  | 103.5 | 108.9 | 112.2 | 115.1   | 118.6 |
| 13.4        | 79.7 | 82.4   | 84.7 | 87.5  | 92.3  | 97.8  | 103.6 | 109.0 | 112.3 | 115.3   | 118.8 |
| 13.6        | 79.8 | 82.4   | 84.8 | 87.6  | 92.4  | 97.9  | 103.7 | 109.1 | 112.5 | 115.4   | 119.0 |
| 13.8        | 79.8 | 82.5   | 84.8 | 87.6  | 92.4  | 98.0  | 103.8 | 109.2 | 112.6 | 115.6   | 119.1 |
| 14.0        | 79.9 | 82.5   | 84.9 | 87.7  | 92.5  | 98.1  | 103.9 | 109.4 | 112.7 | 115.7   | 119.2 |
| 14.2        | 79.9 | 82.6   | 85.0 | 87.8  | 92.6  | 98.2  | 104.0 | 109.5 | 112.8 | 115.8   | 119.4 |
| 14.4        | 80.0 | 82.7   | 85.0 | 87.8  | 92.7  | 98.3  | 104.1 | 109.6 | 112.9 | 115.9   | 119.5 |
| 14.6        | 80.0 | 82.7   | 85.1 | 87.9  | 92.7  | 98.3  | 104.2 | 109.7 | 113.0 | 116.0   | 119.6 |
| 14.8        | 80.1 | 82.8   | 85.2 | 88.0  | 92.8  | 98.4  | 104.3 | 109.8 | 113.1 | 116.1   | 119.7 |
| 15.0        | 80.1 | 82.8   | 85.2 | 88.0  | 92.9  | 98.5  | 104.4 | 109.8 | 113.2 | 116.2   | 119.8 |
| 15.2        | 80.2 | 82.9   | 85.3 | 88.1  | 92.9  | 98.6  | 104.4 | 109.9 | 113.3 | 116.3   | 119.9 |
| 15.4        | 80.2 | 83.0   | 85.3 | 88.2  | 93.0  | 98.6  | 104.5 | 110.0 | 113.4 | 116.4   | 119.9 |
| 15.6        | 80.3 | 83.0   | 85.4 | 88.2  | 93.1  | 98.7  | 104.6 | 110.1 | 113.4 | 116.4   | 120.0 |
| 15.8        | 80.4 | 83.1   | 85.5 | 88.3  | 93.1  | 98.7  | 104.6 | 110.1 | 113.5 | 116.5   | 120.1 |
| 16.0        | 80.4 | 83.1   | 85.5 | 88.3  | 93.2  | 98.8  | 104.7 | 110.2 | 113.6 | 116.6   | 120.1 |
| 16.2        | 80.5 | 83.2   | 85.6 | 88.4  | 93.2  | 98.9  | 104.7 | 110.2 | 113.6 | 116.6   | 120.2 |
| 16.4        | 80.6 | 83.3   | 85.6 | 88.5  | 93.3  | 98.9  | 104.8 | 110.3 | 113.6 | 116.6   | 120.2 |
| 16.6        | 80.6 | 83.3   | 85.7 | 88.5  | 93.3  | 99.0  | 104.8 | 110.3 | 113.7 | 116.7   | 120.2 |
| 16.8        | 80.7 | 83.4   | 85.8 | 88.6  | 93.4  | 99.0  | 104.9 | 110.3 | 113.7 | 116.7   | 120.3 |
| 17.0        | 80.7 | 83.4   | 85.8 | 88.6  | 93.5  | 99.1  | 104.9 | 110.4 | 113.7 | 116.7   | 120.3 |
| 17.2        | 80.8 | 83.5   | 85.9 | 88.7  | 93.5  | 99.1  | 104.9 | 110.4 | 113.8 | 116.7   | 120.3 |
| 17.4        | 80.9 | 83.6   | 85.9 | 88.7  | 93.6  | 99.1  | 105.0 | 110.4 | 113.8 | 116.7   | 120.3 |
| 17.6        | 80.9 | 83.6   | 86.0 | 88.8  | 93.6  | 99.2  | 105.0 | 110.4 | 113.8 | 116.8   | 120.3 |
| 17.8        | 81.0 | 83.7   | 86.1 | 88.9  | 93.6  | 99.2  | 105.0 | 110.4 | 113.8 | 116.8   | 120.3 |
| 18.0        | 81.1 | 83.8   | 86.1 | 88.9  | 93.7  | 99.2  | 105.0 | 110.4 | 113.8 | 116.7   | 120.3 |
| 18.2        | 81.2 | 83.8   | 86.2 | 89.0  | 93.7  | 99.3  | 105.1 | 110.5 | 113.8 | 116.7   | 120.2 |
| 18.4        | 81.2 | 83.9   | 86.2 | 89.0  | 93.8  | 99.3  | 105.1 | 110.5 | 113.8 | 116.7   | 120.2 |
| 18.6        | 81.3 | 84.0   | 86.3 | 89.1  | 93.8  | 99.3  | 105.1 | 110.5 | 113.8 | 116.7   | 120.2 |
| 18.8        | 81.4 | 84.0   | 86.4 | 89.1  | 93.9  | 99.4  | 105.1 | 110.4 | 113.7 | 116.7   | 120.1 |
| 19.0        | 81.4 | 84.1   | 86.4 | 89.2  | 93.9  | 99.4  | 105.1 | 110.4 | 113.7 | 116.6   | 120.1 |
| 19.2        | 81.5 | 84.2   | 86.5 | 89.2  | 93.9  | 99.4  | 105.1 | 110.4 | 113.7 | 116.6   | 120.0 |
| 19.4        | 81.6 | 84.2   | 86.5 | 89.3  | 94.0  | 99.4  | 105.1 | 110.4 | 113.7 | 116.6   | 120.0 |
| 19.6        | 81.7 | 84.3   | 86.6 | 89.3  | 94.0  | 99.4  | 105.1 | 110.4 | 113.6 | 116.5   | 119.9 |
| 19.8        | 81.7 | 84.4   | 86.7 | 89.4  | 94.0  | 99.5  | 105.1 | 110.4 | 113.6 | 116.5   | 119.9 |
| 20.0        | 81.8 | 84.4   | 86.7 | 89.4  | 94.1  | 99.5  | 105.1 | 110.3 | 113.6 | 116.4   | 119.8 |
| 20.2        | 81.9 | 84.5   | 86.8 | 89.5  | 94.1  | 99.5  | 105.1 | 110.3 | 113.5 | 116.3   | 119.7 |
| 20.4        | 82.0 | 84.6   | 86.8 | 89.5  | 94.1  | 99.5  | 105.1 | 110.3 | 113.5 | 116.3   | 119.6 |
| 20.6        | 82.1 | 84.6   | 86.9 | 89.6  | 94.2  | 99.5  | 105.0 | 110.2 | 113.4 | 116.2   | 119.6 |
| 20.8        | 82.1 | 84.7   | 87.0 | 89.6  | 94.2  | 99.5  | 105.0 | 110.2 | 113.3 | 116.1   | 119.5 |
| 21.0        | 82.2 | 84.8   | 87.0 | 89.7  | 94.2  | 99.5  | 105.0 | 110.1 | 113.3 | 116.1   | 119.4 |
| 21.2        | 82.3 | 84.8   | 87.1 | 89.7  | 94.3  | 99.5  | 105.0 | 110.1 | 113.2 | 116.0   | 119.3 |
| 21.4        | 82.4 | 84.9   | 87.1 | 89.8  | 94.3  | 99.5  | 105.0 | 110.0 | 113.2 | 115.9   | 119.2 |
| 21.6        | 82.4 | 85.0   | 87.2 | 89.8  | 94.3  | 99.5  | 104.9 | 110.0 | 113.1 | 115.8   | 119.1 |
| 21.8        | 82.5 | 85.1   | 87.3 | 89.9  | 94.3  | 99.5  | 104.9 | 109.9 | 113.0 | 115.7   | 119.0 |

| Table D. Age-related reference intervals (RIs) for central (aortic) augmentation index (cAIx) for the entire population (n=1038) |      |        |      |       |       |       |       |       |       |         |       |
|----------------------------------------------------------------------------------------------------------------------------------|------|--------|------|-------|-------|-------|-------|-------|-------|---------|-------|
| Age (years)                                                                                                                      | 1 th | 2.5 th | 5 th | 10 th | 25 th | 50 th | 75 th | 90 th | 95 th | 97.5 th | 99 th |
| 5.0                                                                                                                              | 1.8  | 4.5    | 7.1  | 10.2  | 16.0  | 23.3  | 31.4  | 39.4  | 44.5  | 49.1    | 54.7  |
| 5.2                                                                                                                              | 1.4  | 4.1    | 6.5  | 9.6   | 15.3  | 22.4  | 30.3  | 38.2  | 43.2  | 47.7    | 53.2  |
| 5.4                                                                                                                              | 1.0  | 3.6    | 6.0  | 9.0   | 14.6  | 21.6  | 29.3  | 37.0  | 41.9  | 46.3    | 51.7  |
| 5.6                                                                                                                              | 0.6  | 3.2    | 5.5  | 8.5   | 14.0  | 20.8  | 28.4  | 35.9  | 40.7  | 45.1    | 50.4  |
| 5.8                                                                                                                              | 0.3  | 2.8    | 5.1  | 8.0   | 13.3  | 20.0  | 27.5  | 34.9  | 39.7  | 43.9    | 49.1  |
| 6.0                                                                                                                              | -0.1 | 2.4    | 4.7  | 7.5   | 12.8  | 19.3  | 26.7  | 34.0  | 38.6  | 42.8    | 48.0  |
| 6.2                                                                                                                              | -0.4 | 2.0    | 4.3  | 7.1   | 12.2  | 18.7  | 25.9  | 33.1  | 37.7  | 41.8    | 46.9  |
| 6.4                                                                                                                              | -0.7 | 1.7    | 3.9  | 6.6   | 11.7  | 18.1  | 25.2  | 32.2  | 36.8  | 40.8    | 45.8  |
| 6.6                                                                                                                              | -1.0 | 1.4    | 3.5  | 6.2   | 11.2  | 17.5  | 24.5  | 31.5  | 35.9  | 39.9    | 44.8  |
| 6.8                                                                                                                              | -1.2 | 1.1    | 3.2  | 5.9   | 10.8  | 16.9  | 23.9  | 30.7  | 35.1  | 39.1    | 43.9  |
| 7.0                                                                                                                              | -1.5 | 0.8    | 2.9  | 5.5   | 10.3  | 16.4  | 23.3  | 30.0  | 34.3  | 38.3    | 43.0  |
| 7.2                                                                                                                              | -1.7 | 0.5    | 2.6  | 5.1   | 9.9   | 15.9  | 22.7  | 29.3  | 33.6  | 37.5    | 42.2  |
| 7.4                                                                                                                              | -1.9 | 0.2    | 2.3  | 4.8   | 9.5   | 15.5  | 22.1  | 28.7  | 32.9  | 36.8    | 41.4  |
| 7.6                                                                                                                              | -2.2 | 0.0    | 2.0  | 4.5   | 9.2   | 15.0  | 21.6  | 28.1  | 32.3  | 36.1    | 40.7  |
| 7.8                                                                                                                              | -2.4 | -0.3   | 1.7  | 4.2   | 8.8   | 14.6  | 21.1  | 27.6  | 31.7  | 35.5    | 40.0  |
| 8.0                                                                                                                              | -2.6 | -0.5   | 1.5  | 3.9   | 8.5   | 14.2  | 20.6  | 27.0  | 31.1  | 34.8    | 39.4  |
| 8.2                                                                                                                              | -2.8 | -0.7   | 1.2  | 3.7   | 8.2   | 13.8  | 20.2  | 26.5  | 30.6  | 34.3    | 38.7  |
| 8.4                                                                                                                              | -2.9 | -0.9   | 1.0  | 3.4   | 7.9   | 13.5  | 19.8  | 26.0  | 30.1  | 33.7    | 38.2  |
| 8.6                                                                                                                              | -3.1 | -1.1   | 0.8  | 3.2   | 7.6   | 13.1  | 19.4  | 25.6  | 29.6  | 33.2    | 37.6  |
| 8.8                                                                                                                              | -3.3 | -1.3   | 0.6  | 2.9   | 7.3   | 12.8  | 19.0  | 25.2  | 29.1  | 32.7    | 37.1  |
| 9.0                                                                                                                              | -3.4 | -1.5   | 0.4  | 2.7   | 7.0   | 12.5  | 18.7  | 24.8  | 28.7  | 32.3    | 36.6  |
| 9.2                                                                                                                              | -3.6 | -1.6   | 0.2  | 2.5   | 6.8   | 12.2  | 18.3  | 24.4  | 28.3  | 31.8    | 36.1  |
| 9.4                                                                                                                              | -3.7 | -1.8   | 0.0  | 2.3   | 6.5   | 11.9  | 18.0  | 24.0  | 27.9  | 31.4    | 35.7  |
| 9.6                                                                                                                              | -3.9 | -2.0   | -0.2 | 2.1   | 6.3   | 11.7  | 17.7  | 23.7  | 27.5  | 31.0    | 35.3  |
| 9.8                                                                                                                              | -4.0 | -2.1   | -0.3 | 1.9   | 6.1   | 11.4  | 17.4  | 23.3  | 27.2  | 30.6    | 34.9  |
| 10.0                                                                                                                             | -4.1 | -2.3   | -0.5 | 1.7   | 5.9   | 11.2  | 17.1  | 23.0  | 26.8  | 30.3    | 34.5  |
| 10.2                                                                                                                             | -4.2 | -2.4   | -0.6 | 1.6   | 5.7   | 10.9  | 16.8  | 22.7  | 26.5  | 30.0    | 34.1  |
| 10.4                                                                                                                             | -4.4 | -2.5   | -0.8 | 1.4   | 5.5   | 10.7  | 16.6  | 22.4  | 26.2  | 29.6    | 33.8  |
| 10.6                                                                                                                             | -4.5 | -2.7   | -0.9 | 1.3   | 5.3   | 10.5  | 16.4  | 22.2  | 25.9  | 29.3    | 33.5  |
| 10.8                                                                                                                             | -4.6 | -2.8   | -1.1 | 1.1   | 5.2   | 10.3  | 16.1  | 21.9  | 25.7  | 29.1    | 33.2  |
| 11.0                                                                                                                             | -4.7 | -2.9   | -1.2 | 1.0   | 5.0   | 10.1  | 15.9  | 21.7  | 25.4  | 28.8    | 32.9  |
| 11.2                                                                                                                             | -4.8 | -3.0   | -1.3 | 0.8   | 4.8   | 9.9   | 15.7  | 21.5  | 25.2  | 28.5    | 32.7  |
| 11.4                                                                                                                             | -4.9 | -3.1   | -1.4 | 0.7   | 4.7   | 9.8   | 15.5  | 21.2  | 24.9  | 28.3    | 32.4  |
| 11.6                                                                                                                             | -5.0 | -3.2   | -1.5 | 0.6   | 4.5   | 9.6   | 15.3  | 21.0  | 24.7  | 28.1    | 32.2  |
| 11.8                                                                                                                             | -5.1 | -3.3   | -1.7 | 0.5   | 4.4   | 9.4   | 15.2  | 20.9  | 24.5  | 27.9    | 32.0  |
| 12.0                                                                                                                             | -5.2 | -3.4   | -1.8 | 0.3   | 4.3   | 9.3   | 15.0  | 20.7  | 24.3  | 27.7    | 31.7  |
| 12.2                                                                                                                             | -5.2 | -3.5   | -1.9 | 0.2   | 4.1   | 9.2   | 14.8  | 20.5  | 24.2  | 27.5    | 31.6  |
| 12.4                                                                                                                             | -5.3 | -3.6   | -2.0 | 0.1   | 4.0   | 9.0   | 14.7  | 20.3  | 24.0  | 27.3    | 31.4  |
| 12.6                                                                                                                             | -5.4 | -3.7   | -2.0 | 0.0   | 3.9   | 8.9   | 14.5  | 20.2  | 23.8  | 27.2    | 31.2  |
| 12.8                                                                                                                             | -5.5 | -3.8   | -2.1 | -0.1  | 3.8   | 8.8   | 14.4  | 20.1  | 23.7  | 27.0    | 31.1  |
| 13.0                                                                                                                             | -5.6 | -3.8   | -2.2 | -0.2  | 3.7   | 8.7   | 14.3  | 19.9  | 23.6  | 26.9    | 30.9  |
| 13.2                                                                                                                             | -5.6 | -3.9   | -2.3 | -0.3  | 3.6   | 8.6   | 14.2  | 19.8  | 23.4  | 26.8    | 30.8  |
| 13.4                                                                                                                             | -5.7 | -4.0   | -2.4 | -0.3  | 3.5   | 8.5   | 14.1  | 19.7  | 23.3  | 26.6    | 30.7  |
| 13.6                                                                                                                             | -5.8 | -4.1   | -2.5 | -0.4  | 3.4   | 8.4   | 14.0  | 19.6  | 23.2  | 26.5    | 30.6  |
| 13.8                                                                                                                             | -5.8 | -4.1   | -2.5 | -0.5  | 3.3   | 8.3   | 13.9  | 19.5  | 23.1  | 26.4    | 30.5  |
| 14.0                                                                                                                             | -5.9 | -4.2   | -2.6 | -0.6  | 3.3   | 8.2   | 13.8  | 19.4  | 23.0  | 26.3    | 30.4  |
| 14.2                                                                                                                             | -5.9 | -4.3   | -2.7 | -0.6  | 3.2   | 8.1   | 13.7  | 19.3  | 22.9  | 26.3    | 30.3  |
| 14.4                                                                                                                             | -6.0 | -4.3   | -2.7 | -0.7  | 3.1   | 8.0   | 13.6  | 19.2  | 22.9  | 26.2    | 30.2  |
| 14.6                                                                                                                             | -6.0 | -4.4   | -2.8 | -0.8  | 3.0   | 8.0   | 13.6  | 19.2  | 22.8  | 26.1    | 30.2  |
| 14.8                                                                                                                             | -6.1 | -4.4   | -2.9 | -0.8  | 3.0   | 7.9   | 13.5  | 19.1  | 22.7  | 26.1    | 30.1  |
| 15.0                                                                                                                             | -6.1 | -4.5   | -2.9 | -0.9  | 2.9   | 7.8   | 13.4  | 19.1  | 22.7  | 26.0    | 30.1  |
| 15.2                                                                                                                             | -6.2 | -4.5   | -3.0 | -0.9  | 2.9   | 7.8   | 13.4  | 19.0  | 22.6  | 26.0    | 30.0  |
| 15.4                                                                                                                             | -6.2 | -4.6   | -3.0 | -1.0  | 2.8   | 7.7   | 13.3  | 19.0  | 22.6  | 25.9    | 30.0  |
| 15.6                                                                                                                             | -6.3 | -4.6   | -3.1 | -1.1  | 2.8   | 7.7   | 13.3  | 18.9  | 22.6  | 25.9    | 30.0  |
| 15.8                                                                                                                             | -6.3 | -4.7   | -3.1 | -1.1  | 2.7   | 7.6   | 13.2  | 18.9  | 22.5  | 25.9    | 30.0  |
| 16.0                                                                                                                             | -6.4 | -4.7   | -3.2 | -1.1  | 2.7   | 7.6   | 13.2  | 18.9  | 22.5  | 25.9    | 30.0  |
| 16.2                                                                                                                             | -6.4 | -4.8   | -3.2 | -1.2  | 2.6   | 7.5   | 13.2  | 18.8  | 22.5  | 25.9    | 30.0  |
| 16.4                                                                                                                             | -6.5 | -4.8   | -3.2 | -1.2  | 2.6   | 7.5   | 13.2  | 18.8  | 22.5  | 25.9    | 30.0  |
| 16.6                                                                                                                             | -6.5 | -4.9   | -3.3 | -1.3  | 2.5   | 7.5   | 13.1  | 18.8  | 22.5  | 25.9    | 30.0  |
| 16.8                                                                                                                             | -6.5 | -4.9   | -3.3 | -1.3  | 2.5   | 7.5   | 13.1  | 18.8  | 22.5  | 25.9    | 30.0  |
| 17.0                                                                                                                             | -6.6 | -4.9   | -3.4 | -1.3  | 2.5   | 7.4   | 13.1  | 18.8  | 22.5  | 25.9    | 30.0  |
| 17.2                                                                                                                             | -6.6 | -5.0   | -3.4 | -1.4  | 2.5   | 7.4   | 13.1  | 18.8  | 22.5  | 25.9    | 30.1  |
| 17.4                                                                                                                             | -6.6 | -5.0   | -3.4 | -1.4  | 2.4   | 7.4   | 13.1  | 18.8  | 22.5  | 25.9    | 30.1  |
| 17.6                                                                                                                             | -6.7 | -5.0   | -3.5 | -1.4  | 2.4   | 7.4   | 13.1  | 18.8  | 22.6  | 26.0    | 30.2  |
| 17.8                                                                                                                             | -6.7 | -5.1   | -3.5 | -1.5  | 2.4   | 7.4   | 13.1  | 18.9  | 22.6  | 26.0    | 30.2  |
| 18.0                                                                                                                             | -6.7 | -5.1   | -3.5 | -1.5  | 2.4   | 7.4   | 13.1  | 18.9  | 22.6  | 26.1    | 30.3  |
| 18.2                                                                                                                             | -6.7 | -5.1   | -3.5 | -1.5  | 2.3   | 7.4   | 13.1  | 18.9  | 22.7  | 26.1    | 30.3  |
| 18.4                                                                                                                             | -6.8 | -5.1   | -3.6 | -1.5  | 2.3   | 7.4   | 13.1  | 18.9  | 22.7  | 26.2    | 30.4  |
| 18.6                                                                                                                             | -6.8 | -5.2   | -3.6 | -1.6  | 2.3   | 7.4   | 13.1  | 19.0  | 22.8  | 26.2    | 30.5  |
| 18.8                                                                                                                             | -6.8 | -5.2   | -3.6 | -1.6  | 2.3   | 7.4   | 13.2  | 19.0  | 22.8  | 26.3    | 30.6  |
| 19.0                                                                                                                             | -6.8 | -5.2   | -3.6 | -1.6  | 2.3   | 7.4   | 13.2  | 19.1  | 22.9  | 26.4    | 30.6  |
| 19.2                                                                                                                             | -6.9 | -5.2   | -3.6 | -1.6  | 2.3   | 7.4   | 13.2  | 19.1  | 22.9  | 26.4    | 30.7  |
| 19.4                                                                                                                             | -6.9 | -5.3   | -3.7 | -1.6  | 2.3   | 7.4   | 13.2  | 19.2  | 23.0  | 26.5    | 30.8  |
| 19.6                                                                                                                             | -6.9 | -5.3   | -3.7 | -1.6  | 2.3   | 7.4   | 13.3  | 19.2  | 23.1  | 26.6    | 30.9  |
| 19.8                                                                                                                             | -6.9 | -5.3   | -3.7 | -1.6  | 2.3   | 7.4   | 13.3  | 19.3  | 23.2  | 26.7    | 31.0  |
| 20.0                                                                                                                             | -6.9 | -5.3   | -3.7 | -1.6  | 2.3   | 7.4   | 13.4  | 19.3  | 23.2  | 26.8    | 31.1  |
| 20.2                                                                                                                             | -7.0 | -5.3   | -3.7 | -1.7  | 2.3   | 7.4   | 13.4  | 19.4  | 23.3  | 26.9    | 31.3  |
| 20.4                                                                                                                             | -7.0 | -5.3   | -3.7 | -1.7  | 2.3   | 7.5   | 13.4  | 19.5  | 23.4  | 27.0    | 31.4  |
| 20.6                                                                                                                             | -7.0 | -5.3   | -3.7 | -1.7  | 2.3   | 7.5   | 13.5  | 19.5  | 23.5  | 27.1    | 31.5  |
| 20.8                                                                                                                             | -7.0 | -5.4   | -3.7 | -1.7  | 2.3   | 7.5   | 13.5  | 19.6  | 23.6  | 27.2    | 31.6  |
| 21.0                                                                                                                             | -7.0 | -5.4   | -3.8 | -1.7  | 2.3   | 7.6   | 13.6  | 19.7  | 23.7  | 27.3    | 31.8  |
| 21.2                                                                                                                             | -7.0 | -5.4   | -3.8 | -1.7  | 2.3   | 7.6   | 13.7  | 19.8  | 23.8  | 27.4    | 31.9  |
| 21.4                                                                                                                             | -7.1 | -5.4   | -3.8 | -1.7  | 2.4   | 7.6   | 13.7  | 19.9  | 23.9  | 27.6    | 32.0  |
| 21.6                                                                                                                             | -7.1 | -5.4   | -3.8 | -1.7  | 2.4   | 7.7   | 13.8  | 20.0  | 24.0  | 27.7    | 32.2  |
| 21.8                                                                                                                             | -7.1 | -5.4   | -3.8 | -1.7  | 2.4   | 7.7   | 13.8  | 20.1  | 24.1  | 27.8    | 32.3  |



| Table E. Age-related reference intervals (RIs) for central (aortic) augmentation index (cAIx) for males (n=576) |      |        |      |       |       |       |       |       |       |         |       |
|-----------------------------------------------------------------------------------------------------------------|------|--------|------|-------|-------|-------|-------|-------|-------|---------|-------|
| Age (years)                                                                                                     | 1 th | 2.5 th | 5 th | 10 th | 25 th | 50 th | 75 th | 90 th | 95 th | 97.5 th | 99 th |
| 5.0                                                                                                             | 4.6  | 6.0    | 7.2  | 8.7   | 11.4  | 14.6  | 18.1  | 21.4  | 23.4  | 25.3    | 27.5  |
| 5.2                                                                                                             | 3.8  | 5.2    | 6.5  | 8.0   | 10.8  | 14.2  | 17.8  | 21.3  | 23.5  | 25.5    | 27.8  |
| 5.4                                                                                                             | 3.0  | 4.5    | 5.8  | 7.4   | 10.3  | 13.8  | 17.6  | 21.2  | 23.5  | 25.6    | 28.1  |
| 5.6                                                                                                             | 2.4  | 3.8    | 5.2  | 6.8   | 9.8   | 13.4  | 17.3  | 21.2  | 23.6  | 25.8    | 28.4  |
| 5.8                                                                                                             | 1.7  | 3.2    | 4.6  | 6.3   | 9.3   | 13.0  | 17.1  | 21.1  | 23.6  | 25.9    | 28.6  |
| 6.0                                                                                                             | 1.2  | 2.7    | 4.1  | 5.8   | 8.9   | 12.7  | 16.9  | 21.0  | 23.6  | 26.0    | 28.8  |
| 6.2                                                                                                             | 0.6  | 2.2    | 3.6  | 5.3   | 8.5   | 12.4  | 16.7  | 20.9  | 23.6  | 26.1    | 29.0  |
| 6.4                                                                                                             | 0.2  | 1.7    | 3.1  | 4.8   | 8.1   | 12.1  | 16.5  | 20.9  | 23.6  | 26.2    | 29.2  |
| 6.6                                                                                                             | -0.3 | 1.2    | 2.7  | 4.4   | 7.7   | 11.8  | 16.3  | 20.8  | 23.6  | 26.2    | 29.4  |
| 6.8                                                                                                             | -0.7 | 0.8    | 2.3  | 4.0   | 7.3   | 11.5  | 16.1  | 20.7  | 23.6  | 26.3    | 29.5  |
| 7.0                                                                                                             | -1.1 | 0.4    | 1.9  | 3.7   | 7.0   | 11.2  | 15.9  | 20.6  | 23.6  | 26.3    | 29.6  |
| 7.2                                                                                                             | -1.4 | 0.1    | 1.5  | 3.3   | 6.7   | 11.0  | 15.8  | 20.5  | 23.6  | 26.4    | 29.7  |
| 7.4                                                                                                             | -1.7 | -0.2   | 1.2  | 3.0   | 6.4   | 10.7  | 15.6  | 20.4  | 23.6  | 26.4    | 29.8  |
| 7.6                                                                                                             | -2.0 | -0.5   | 0.9  | 2.7   | 6.1   | 10.5  | 15.4  | 20.3  | 23.5  | 26.4    | 29.9  |
| 7.8                                                                                                             | -2.3 | -0.8   | 0.6  | 2.4   | 5.8   | 10.2  | 15.3  | 20.3  | 23.5  | 26.4    | 30.0  |
| 8.0                                                                                                             | -2.6 | -1.1   | 0.3  | 2.1   | 5.6   | 10.0  | 15.1  | 20.2  | 23.4  | 26.4    | 30.0  |
| 8.2                                                                                                             | -2.8 | -1.3   | 0.1  | 1.9   | 5.3   | 9.8   | 14.9  | 20.1  | 23.4  | 26.4    | 30.1  |
| 8.4                                                                                                             | -3.0 | -1.6   | -0.2 | 1.6   | 5.1   | 9.6   | 14.8  | 20.0  | 23.3  | 26.4    | 30.1  |
| 8.6                                                                                                             | -3.2 | -1.8   | -0.4 | 1.4   | 4.9   | 9.4   | 14.6  | 19.9  | 23.3  | 26.4    | 30.1  |
| 8.8                                                                                                             | -3.4 | -2.0   | -0.6 | 1.2   | 4.7   | 9.2   | 14.5  | 19.8  | 23.2  | 26.3    | 30.2  |
| 9.0                                                                                                             | -3.6 | -2.2   | -0.8 | 1.0   | 4.5   | 9.0   | 14.3  | 19.7  | 23.1  | 26.3    | 30.2  |
| 9.2                                                                                                             | -3.8 | -2.4   | -1.0 | 0.8   | 4.3   | 8.9   | 14.2  | 19.6  | 23.1  | 26.2    | 30.1  |
| 9.4                                                                                                             | -3.9 | -2.5   | -1.2 | 0.6   | 4.1   | 8.7   | 14.0  | 19.5  | 23.0  | 26.2    | 30.1  |
| 9.6                                                                                                             | -4.1 | -2.7   | -1.3 | 0.4   | 3.9   | 8.5   | 13.9  | 19.3  | 22.9  | 26.1    | 30.1  |
| 9.8                                                                                                             | -4.2 | -2.8   | -1.5 | 0.3   | 3.8   | 8.4   | 13.8  | 19.2  | 22.8  | 26.1    | 30.1  |
| 10.0                                                                                                            | -4.3 | -3.0   | -1.6 | 0.1   | 3.6   | 8.2   | 13.6  | 19.1  | 22.7  | 26.0    | 30.0  |
| 10.2                                                                                                            | -4.4 | -3.1   | -1.8 | 0.0   | 3.4   | 8.1   | 13.5  | 19.0  | 22.6  | 25.9    | 30.0  |
| 10.4                                                                                                            | -4.5 | -3.2   | -1.9 | -0.2  | 3.3   | 7.9   | 13.4  | 18.9  | 22.5  | 25.9    | 29.9  |
| 10.6                                                                                                            | -4.6 | -3.4   | -2.0 | -0.3  | 3.2   | 7.8   | 13.2  | 18.8  | 22.4  | 25.8    | 29.9  |
| 10.8                                                                                                            | -4.7 | -3.5   | -2.2 | -0.4  | 3.0   | 7.7   | 13.1  | 18.7  | 22.3  | 25.7    | 29.8  |
| 11.0                                                                                                            | -4.8 | -3.6   | -2.3 | -0.5  | 2.9   | 7.5   | 13.0  | 18.6  | 22.2  | 25.6    | 29.7  |
| 11.2                                                                                                            | -4.9 | -3.7   | -2.4 | -0.6  | 2.8   | 7.4   | 12.9  | 18.5  | 22.1  | 25.5    | 29.6  |
| 11.4                                                                                                            | -5.0 | -3.7   | -2.5 | -0.8  | 2.7   | 7.3   | 12.8  | 18.4  | 22.0  | 25.4    | 29.5  |
| 11.6                                                                                                            | -5.0 | -3.8   | -2.6 | -0.9  | 2.6   | 7.2   | 12.6  | 18.3  | 21.9  | 25.3    | 29.5  |
| 11.8                                                                                                            | -5.1 | -3.9   | -2.6 | -0.9  | 2.5   | 7.1   | 12.5  | 18.1  | 21.8  | 25.2    | 29.4  |
| 12.0                                                                                                            | -5.2 | -4.0   | -2.7 | -1.0  | 2.4   | 7.0   | 12.4  | 18.0  | 21.7  | 25.1    | 29.2  |
| 12.2                                                                                                            | -5.2 | -4.0   | -2.8 | -1.1  | 2.3   | 6.8   | 12.3  | 17.9  | 21.6  | 25.0    | 29.1  |
| 12.4                                                                                                            | -5.3 | -4.1   | -2.9 | -1.2  | 2.2   | 6.7   | 12.2  | 17.8  | 21.5  | 24.9    | 29.0  |
| 12.6                                                                                                            | -5.3 | -4.2   | -2.9 | -1.3  | 2.1   | 6.6   | 12.1  | 17.7  | 21.4  | 24.7    | 28.9  |
| 12.8                                                                                                            | -5.4 | -4.2   | -3.0 | -1.3  | 2.0   | 6.5   | 12.0  | 17.6  | 21.2  | 24.6    | 28.8  |
| 13.0                                                                                                            | -5.4 | -4.3   | -3.1 | -1.4  | 1.9   | 6.5   | 11.9  | 17.5  | 21.1  | 24.5    | 28.7  |
| 13.2                                                                                                            | -5.4 | -4.3   | -3.1 | -1.5  | 1.8   | 6.4   | 11.8  | 17.3  | 21.0  | 24.4    | 28.5  |
| 13.4                                                                                                            | -5.5 | -4.3   | -3.2 | -1.5  | 1.8   | 6.3   | 11.7  | 17.2  | 20.9  | 24.2    | 28.4  |
| 13.6                                                                                                            | -5.5 | -4.4   | -3.2 | -1.6  | 1.7   | 6.2   | 11.6  | 17.1  | 20.7  | 24.1    | 28.2  |
| 13.8                                                                                                            | -5.5 | -4.4   | -3.3 | -1.6  | 1.6   | 6.1   | 11.5  | 17.0  | 20.6  | 24.0    | 28.1  |
| 14.0                                                                                                            | -5.6 | -4.5   | -3.3 | -1.7  | 1.6   | 6.0   | 11.4  | 16.9  | 20.5  | 23.8    | 27.9  |
| 14.2                                                                                                            | -5.6 | -4.5   | -3.3 | -1.7  | 1.5   | 5.9   | 11.3  | 16.7  | 20.4  | 23.7    | 27.8  |
| 14.4                                                                                                            | -5.6 | -4.5   | -3.4 | -1.8  | 1.4   | 5.9   | 11.2  | 16.6  | 20.2  | 23.6    | 27.6  |
| 14.6                                                                                                            | -5.6 | -4.5   | -3.4 | -1.8  | 1.4   | 5.8   | 11.1  | 16.5  | 20.1  | 23.4    | 27.5  |
| 14.8                                                                                                            | -5.6 | -4.6   | -3.4 | -1.9  | 1.3   | 5.7   | 11.0  | 16.4  | 20.0  | 23.3    | 27.3  |
| 15.0                                                                                                            | -5.6 | -4.6   | -3.5 | -1.9  | 1.3   | 5.6   | 10.9  | 16.3  | 19.8  | 23.1    | 27.2  |
| 15.2                                                                                                            | -5.7 | -4.6   | -3.5 | -1.9  | 1.2   | 5.6   | 10.8  | 16.2  | 19.7  | 23.0    | 27.0  |
| 15.4                                                                                                            | -5.7 | -4.6   | -3.5 | -2.0  | 1.2   | 5.5   | 10.7  | 16.0  | 19.6  | 22.8    | 26.8  |
| 15.6                                                                                                            | -5.7 | -4.6   | -3.5 | -2.0  | 1.1   | 5.4   | 10.6  | 15.9  | 19.4  | 22.7    | 26.6  |
| 15.8                                                                                                            | -5.7 | -4.6   | -3.5 | -2.0  | 1.1   | 5.4   | 10.5  | 15.8  | 19.3  | 22.5    | 26.5  |
| 16.0                                                                                                            | -5.7 | -4.7   | -3.5 | -2.0  | 1.1   | 5.3   | 10.4  | 15.7  | 19.2  | 22.4    | 26.3  |
| 16.2                                                                                                            | -5.7 | -4.7   | -3.6 | -2.1  | 1.0   | 5.3   | 10.3  | 15.6  | 19.0  | 22.2    | 26.1  |
| 16.4                                                                                                            | -5.7 | -4.7   | -3.6 | -2.1  | 1.0   | 5.2   | 10.2  | 15.4  | 18.9  | 22.0    | 25.9  |
| 16.6                                                                                                            | -5.7 | -4.7   | -3.6 | -2.1  | 1.0   | 5.1   | 10.2  | 15.3  | 18.7  | 21.9    | 25.7  |
| 16.8                                                                                                            | -5.7 | -4.7   | -3.6 | -2.1  | 0.9   | 5.1   | 10.1  | 15.2  | 18.6  | 21.7    | 25.6  |
| 17.0                                                                                                            | -5.7 | -4.7   | -3.6 | -2.1  | 0.9   | 5.0   | 10.0  | 15.1  | 18.5  | 21.6    | 25.4  |
| 17.2                                                                                                            | -5.7 | -4.7   | -3.6 | -2.1  | 0.9   | 5.0   | 9.9   | 15.0  | 18.3  | 21.4    | 25.2  |
| 17.4                                                                                                            | -5.7 | -4.7   | -3.6 | -2.1  | 0.8   | 4.9   | 9.8   | 14.9  | 18.2  | 21.2    | 25.0  |
| 17.6                                                                                                            | -5.7 | -4.7   | -3.6 | -2.1  | 0.8   | 4.9   | 9.7   | 14.7  | 18.0  | 21.1    | 24.8  |
| 17.8                                                                                                            | -5.6 | -4.6   | -3.6 | -2.1  | 0.8   | 4.8   | 9.6   | 14.6  | 17.9  | 20.9    | 24.6  |
| 18.0                                                                                                            | -5.6 | -4.6   | -3.6 | -2.1  | 0.8   | 4.8   | 9.6   | 14.5  | 17.7  | 20.7    | 24.4  |
| 18.2                                                                                                            | -5.6 | -4.6   | -3.6 | -2.1  | 0.8   | 4.7   | 9.5   | 14.4  | 17.6  | 20.6    | 24.2  |
| 18.4                                                                                                            | -5.6 | -4.6   | -3.6 | -2.1  | 0.7   | 4.7   | 9.4   | 14.3  | 17.4  | 20.4    | 24.0  |
| 18.6                                                                                                            | -5.6 | -4.6   | -3.6 | -2.1  | 0.7   | 4.7   | 9.3   | 14.1  | 17.3  | 20.2    | 23.8  |
| 18.8                                                                                                            | -5.6 | -4.6   | -3.5 | -2.1  | 0.7   | 4.6   | 9.2   | 14.0  | 17.2  | 20.0    | 23.6  |
| 19.0                                                                                                            | -5.6 | -4.6   | -3.5 | -2.1  | 0.7   | 4.6   | 9.2   | 13.9  | 17.0  | 19.9    | 23.4  |
| 19.2                                                                                                            | -5.5 | -4.6   | -3.5 | -2.1  | 0.7   | 4.5   | 9.1   | 13.8  | 16.9  | 19.7    | 23.2  |
| 19.4                                                                                                            | -5.5 | -4.5   | -3.5 | -2.1  | 0.7   | 4.5   | 9.0   | 13.7  | 16.7  | 19.5    | 23.0  |
| 19.6                                                                                                            | -5.5 | -4.5   | -3.5 | -2.1  | 0.7   | 4.5   | 8.9   | 13.5  | 16.6  | 19.3    | 22.8  |
| 19.8                                                                                                            | -5.5 | -4.5   | -3.5 | -2.1  | 0.7   | 4.4   | 8.9   | 13.4  | 16.4  | 19.2    | 22.5  |
| 20.0                                                                                                            | -5.4 | -4.5   | -3.4 | -2.1  | 0.7   | 4.4   | 8.8   | 13.3  | 16.3  | 19.0    | 22.3  |
| 20.2                                                                                                            | -5.4 | -4.4   | -3.4 | -2.1  | 0.7   | 4.4   | 8.7   | 13.2  | 16.1  | 18.8    | 22.1  |
| 20.4                                                                                                            | -5.4 | -4.4   | -3.4 | -2.0  | 0.7   | 4.3   | 8.6   | 13.1  | 16.0  | 18.6    | 21.9  |
| 20.6                                                                                                            | -5.4 | -4.4   | -3.4 | -2.0  | 0.7   | 4.3   | 8.6   | 12.9  | 15.8  | 18.5    | 21.7  |
| 20.8                                                                                                            | -5.3 | -4.4   | -3.4 | -2.0  | 0.7   | 4.3   | 8.5   | 12.8  | 15.7  | 18.3    | 21.5  |
| 21.0                                                                                                            | -5.3 | -4.3   | -3.3 | -2.0  | 0.7   | 4.2   | 8.4   | 12.7  | 15.5  | 18.1    | 21.3  |
| 21.2                                                                                                            | -5.3 | -4.3   | -3.3 | -2.0  | 0.7   | 4.2   | 8.3   | 12.6  | 15.4  | 17.9    | 21.0  |
| 21.4                                                                                                            | -5.2 | -4.3   | -3.3 | -1.9  | 0.7   | 4.2   | 8.3   | 12.5  | 15.2  | 17.7    | 20.8  |
| 21.6                                                                                                            | -5.2 | -4.2   | -3.2 | -1.9  | 0.7   | 4.1   | 8.2   | 12.4  | 15.1  | 17.6    | 20.6  |

Table F. Age-related reference intervals (RIs) for central (aortic) augmentation index (cAIx) for females (n=462)

| Age (years) | 1 th | 2.5 th | 5 th | 10 th | 25 th | 50 th | 75 th | 90 th | 95 th | 97.5 th | 99 th |
|-------------|------|--------|------|-------|-------|-------|-------|-------|-------|---------|-------|
| 5.2         | 3.5  | 6.8    | 9.7  | 13.3  | 19.8  | 27.5  | 35.8  | 43.7  | 48.6  | 53.0    | 58.2  |
| 5.4         | 2.9  | 6.1    | 9.0  | 12.6  | 18.9  | 26.5  | 34.6  | 42.3  | 47.2  | 51.5    | 56.6  |
| 5.6         | 2.4  | 5.5    | 8.4  | 11.8  | 18.0  | 25.5  | 33.5  | 41.1  | 45.8  | 50.1    | 55.1  |
| 5.8         | 1.9  | 4.9    | 7.7  | 11.1  | 17.2  | 24.6  | 32.4  | 39.9  | 44.6  | 48.8    | 53.7  |
| 6.0         | 1.4  | 4.4    | 7.2  | 10.5  | 16.5  | 23.7  | 31.4  | 38.8  | 43.4  | 47.5    | 52.4  |
| 6.2         | 0.9  | 3.9    | 6.6  | 9.9   | 15.8  | 22.9  | 30.5  | 37.8  | 42.3  | 46.3    | 51.2  |
| 6.4         | 0.5  | 3.4    | 6.1  | 9.3   | 15.1  | 22.1  | 29.6  | 36.8  | 41.2  | 45.2    | 50.0  |
| 6.6         | 0.2  | 3.0    | 5.6  | 8.8   | 14.5  | 21.4  | 28.8  | 35.8  | 40.3  | 44.2    | 48.9  |
| 6.8         | -0.2 | 2.6    | 5.2  | 8.3   | 13.9  | 20.7  | 28.0  | 35.0  | 39.3  | 43.2    | 47.8  |
| 7.0         | -0.5 | 2.2    | 4.8  | 7.8   | 13.4  | 20.1  | 27.3  | 34.1  | 38.4  | 42.3    | 46.8  |
| 7.2         | -0.9 | 1.9    | 4.4  | 7.4   | 12.9  | 19.5  | 26.6  | 33.4  | 37.6  | 41.4    | 45.9  |
| 7.4         | -1.2 | 1.5    | 4.0  | 7.0   | 12.4  | 18.9  | 25.9  | 32.6  | 36.8  | 40.6    | 45.0  |
| 7.6         | -1.4 | 1.2    | 3.6  | 6.6   | 11.9  | 18.4  | 25.3  | 31.9  | 36.1  | 39.8    | 44.2  |
| 7.8         | -1.7 | 0.9    | 3.3  | 6.2   | 11.5  | 17.8  | 24.7  | 31.3  | 35.4  | 39.0    | 43.4  |
| 8.0         | -1.9 | 0.6    | 3.0  | 5.9   | 11.1  | 17.4  | 24.1  | 30.6  | 34.7  | 38.3    | 42.6  |
| 8.2         | -2.2 | 0.4    | 2.7  | 5.6   | 10.7  | 16.9  | 23.6  | 30.0  | 34.1  | 37.6    | 41.9  |
| 8.4         | -2.4 | 0.1    | 2.4  | 5.2   | 10.3  | 16.5  | 23.1  | 29.5  | 33.5  | 37.0    | 41.2  |
| 8.6         | -2.6 | -0.1   | 2.2  | 5.0   | 10.0  | 16.1  | 22.7  | 28.9  | 32.9  | 36.4    | 40.6  |
| 8.8         | -2.8 | -0.3   | 1.9  | 4.7   | 9.7   | 15.7  | 22.2  | 28.4  | 32.3  | 35.8    | 40.0  |
| 9.0         | -2.9 | -0.5   | 1.7  | 4.4   | 9.3   | 15.3  | 21.8  | 28.0  | 31.8  | 35.3    | 39.4  |
| 9.2         | -3.1 | -0.7   | 1.5  | 4.2   | 9.1   | 15.0  | 21.4  | 27.5  | 31.3  | 34.8    | 38.9  |
| 9.4         | -3.3 | -0.9   | 1.3  | 4.0   | 8.8   | 14.7  | 21.0  | 27.1  | 30.9  | 34.3    | 38.3  |
| 9.6         | -3.4 | -1.1   | 1.1  | 3.7   | 8.5   | 14.4  | 20.6  | 26.7  | 30.4  | 33.8    | 37.8  |
| 9.8         | -3.5 | -1.2   | 0.9  | 3.5   | 8.3   | 14.1  | 20.3  | 26.3  | 30.0  | 33.4    | 37.4  |
| 10.0        | -3.7 | -1.4   | 0.7  | 3.4   | 8.1   | 13.8  | 20.0  | 25.9  | 29.6  | 33.0    | 36.9  |
| 10.2        | -3.8 | -1.5   | 0.6  | 3.2   | 7.9   | 13.5  | 19.7  | 25.6  | 29.3  | 32.6    | 36.5  |
| 10.4        | -3.9 | -1.6   | 0.4  | 3.0   | 7.7   | 13.3  | 19.4  | 25.3  | 28.9  | 32.2    | 36.1  |
| 10.6        | -4.0 | -1.8   | 0.3  | 2.9   | 7.5   | 13.1  | 19.1  | 24.9  | 28.6  | 31.8    | 35.7  |
| 10.8        | -4.1 | -1.9   | 0.2  | 2.7   | 7.3   | 12.9  | 18.9  | 24.7  | 28.3  | 31.5    | 35.4  |
| 11.0        | -4.2 | -2.0   | 0.1  | 2.6   | 7.1   | 12.7  | 18.6  | 24.4  | 28.0  | 31.2    | 35.0  |
| 11.2        | -4.3 | -2.1   | 0.0  | 2.5   | 7.0   | 12.5  | 18.4  | 24.1  | 27.7  | 30.9    | 34.7  |
| 11.4        | -4.3 | -2.2   | -0.1 | 2.3   | 6.8   | 12.3  | 18.2  | 23.9  | 27.4  | 30.6    | 34.4  |
| 11.6        | -4.4 | -2.2   | -0.2 | 2.2   | 6.7   | 12.1  | 18.0  | 23.7  | 27.2  | 30.4    | 34.1  |
| 11.8        | -4.5 | -2.3   | -0.3 | 2.1   | 6.6   | 12.0  | 17.8  | 23.4  | 27.0  | 30.1    | 33.9  |
| 12.0        | -4.5 | -2.4   | -0.4 | 2.0   | 6.4   | 11.8  | 17.7  | 23.2  | 26.7  | 29.9    | 33.6  |
| 12.2        | -4.6 | -2.5   | -0.5 | 1.9   | 6.3   | 11.7  | 17.5  | 23.1  | 26.5  | 29.7    | 33.4  |
| 12.4        | -4.6 | -2.5   | -0.5 | 1.9   | 6.2   | 11.6  | 17.3  | 22.9  | 26.3  | 29.4    | 33.2  |
| 12.6        | -4.7 | -2.6   | -0.6 | 1.8   | 6.1   | 11.5  | 17.2  | 22.7  | 26.2  | 29.3    | 32.9  |
| 12.8        | -4.7 | -2.6   | -0.7 | 1.7   | 6.1   | 11.3  | 17.1  | 22.6  | 26.0  | 29.1    | 32.8  |
| 13.0        | -4.7 | -2.7   | -0.7 | 1.7   | 6.0   | 11.3  | 17.0  | 22.4  | 25.9  | 28.9    | 32.6  |
| 13.2        | -4.8 | -2.7   | -0.8 | 1.6   | 5.9   | 11.2  | 16.8  | 22.3  | 25.7  | 28.8    | 32.4  |
| 13.4        | -4.8 | -2.7   | -0.8 | 1.6   | 5.9   | 11.1  | 16.7  | 22.2  | 25.6  | 28.6    | 32.2  |
| 13.6        | -4.8 | -2.7   | -0.8 | 1.5   | 5.8   | 11.0  | 16.7  | 22.1  | 25.5  | 28.5    | 32.1  |
| 13.8        | -4.8 | -2.8   | -0.9 | 1.5   | 5.8   | 10.9  | 16.6  | 22.0  | 25.3  | 28.4    | 32.0  |
| 14.0        | -4.8 | -2.8   | -0.9 | 1.5   | 5.7   | 10.9  | 16.5  | 21.9  | 25.2  | 28.3    | 31.9  |
| 14.2        | -4.8 | -2.8   | -0.9 | 1.5   | 5.7   | 10.8  | 16.4  | 21.8  | 25.2  | 28.2    | 31.7  |
| 14.4        | -4.9 | -2.8   | -0.9 | 1.4   | 5.7   | 10.8  | 16.4  | 21.7  | 25.1  | 28.1    | 31.6  |
| 14.6        | -4.9 | -2.8   | -0.9 | 1.4   | 5.6   | 10.8  | 16.3  | 21.7  | 25.0  | 28.0    | 31.6  |
| 14.8        | -4.8 | -2.8   | -0.9 | 1.4   | 5.6   | 10.7  | 16.3  | 21.6  | 24.9  | 27.9    | 31.5  |
| 15.0        | -4.8 | -2.8   | -0.9 | 1.4   | 5.6   | 10.7  | 16.3  | 21.6  | 24.9  | 27.9    | 31.4  |
| 15.2        | -4.8 | -2.8   | -0.9 | 1.4   | 5.6   | 10.7  | 16.2  | 21.5  | 24.8  | 27.8    | 31.3  |
| 15.4        | -4.8 | -2.8   | -0.9 | 1.4   | 5.6   | 10.7  | 16.2  | 21.5  | 24.8  | 27.8    | 31.3  |
| 15.6        | -4.8 | -2.8   | -0.9 | 1.4   | 5.6   | 10.7  | 16.2  | 21.5  | 24.8  | 27.7    | 31.3  |
| 15.8        | -4.8 | -2.7   | -0.9 | 1.4   | 5.6   | 10.7  | 16.2  | 21.5  | 24.8  | 27.7    | 31.2  |
| 16.0        | -4.8 | -2.7   | -0.8 | 1.5   | 5.6   | 10.7  | 16.2  | 21.4  | 24.7  | 27.7    | 31.2  |
| 16.2        | -4.7 | -2.7   | -0.8 | 1.5   | 5.6   | 10.7  | 16.2  | 21.4  | 24.7  | 27.7    | 31.2  |
| 16.4        | -4.7 | -2.7   | -0.8 | 1.5   | 5.7   | 10.7  | 16.2  | 21.4  | 24.7  | 27.7    | 31.2  |
| 16.6        | -4.7 | -2.6   | -0.8 | 1.5   | 5.7   | 10.7  | 16.2  | 21.5  | 24.7  | 27.7    | 31.2  |
| 16.8        | -4.6 | -2.6   | -0.7 | 1.6   | 5.7   | 10.8  | 16.2  | 21.5  | 24.8  | 27.7    | 31.2  |
| 17.0        | -4.6 | -2.6   | -0.7 | 1.6   | 5.8   | 10.8  | 16.3  | 21.5  | 24.8  | 27.7    | 31.2  |
| 17.2        | -4.6 | -2.5   | -0.6 | 1.7   | 5.8   | 10.8  | 16.3  | 21.5  | 24.8  | 27.7    | 31.2  |
| 17.4        | -4.5 | -2.5   | -0.6 | 1.7   | 5.8   | 10.9  | 16.3  | 21.6  | 24.8  | 27.8    | 31.2  |
| 17.6        | -4.5 | -2.4   | -0.6 | 1.7   | 5.9   | 10.9  | 16.4  | 21.6  | 24.9  | 27.8    | 31.3  |
| 17.8        | -4.4 | -2.4   | -0.5 | 1.8   | 5.9   | 11.0  | 16.4  | 21.7  | 24.9  | 27.8    | 31.3  |
| 18.0        | -4.4 | -2.3   | -0.5 | 1.9   | 6.0   | 11.0  | 16.5  | 21.7  | 25.0  | 27.9    | 31.4  |
| 18.2        | -4.3 | -2.3   | -0.4 | 1.9   | 6.1   | 11.1  | 16.6  | 21.8  | 25.0  | 27.9    | 31.4  |
| 18.4        | -4.3 | -2.2   | -0.3 | 2.0   | 6.1   | 11.2  | 16.6  | 21.8  | 25.1  | 28.0    | 31.5  |
| 18.6        | -4.2 | -2.2   | -0.3 | 2.0   | 6.2   | 11.2  | 16.7  | 21.9  | 25.2  | 28.1    | 31.6  |
| 18.8        | -4.1 | -2.1   | -0.2 | 2.1   | 6.3   | 11.3  | 16.8  | 22.0  | 25.2  | 28.2    | 31.6  |
| 19.0        | -4.1 | -2.0   | -0.1 | 2.2   | 6.3   | 11.4  | 16.8  | 22.1  | 25.3  | 28.2    | 31.7  |
| 19.2        | -4.0 | -2.0   | -0.1 | 2.3   | 6.4   | 11.5  | 16.9  | 22.1  | 25.4  | 28.3    | 31.8  |
| 19.4        | -3.9 | -1.9   | 0.0  | 2.3   | 6.5   | 11.6  | 17.0  | 22.2  | 25.5  | 28.4    | 31.9  |
| 19.6        | -3.9 | -1.8   | 0.1  | 2.4   | 6.6   | 11.7  | 17.1  | 22.3  | 25.6  | 28.5    | 32.0  |
| 19.8        | -3.8 | -1.7   | 0.2  | 2.5   | 6.7   | 11.7  | 17.2  | 22.4  | 25.7  | 28.6    | 32.1  |
| 20.0        | -3.7 | -1.7   | 0.3  | 2.6   | 6.8   | 11.8  | 17.3  | 22.5  | 25.8  | 28.7    | 32.2  |
| 20.2        | -3.7 | -1.6   | 0.3  | 2.7   | 6.9   | 11.9  | 17.4  | 22.6  | 25.9  | 28.8    | 32.3  |
| 20.4        | -3.6 | -1.5   | 0.4  | 2.8   | 7.0   | 12.0  | 17.5  | 22.8  | 26.0  | 29.0    | 32.4  |
| 20.6        | -3.5 | -1.4   | 0.5  | 2.9   | 7.1   | 12.2  | 17.6  | 22.9  | 26.2  | 29.1    | 32.6  |
| 20.8        | -3.4 | -1.3   | 0.6  | 3.0   | 7.2   | 12.3  | 17.8  | 23.0  | 26.3  | 29.2    | 32.7  |
| 21.0        | -3.3 | -1.2   | 0.7  | 3.1   | 7.3   | 12.4  | 17.9  | 23.1  | 26.4  | 29.3    | 32.8  |
| 21.2        | -3.2 | -1.1   | 0.8  | 3.2   | 7.4   | 12.5  | 18.0  | 23.3  | 26.5  | 29.5    | 33.0  |
| 21.4        | -3.2 | -1.0   | 0.9  | 3.3   | 7.5   | 12.6  | 18.1  | 23.4  | 26.7  | 29.6    | 33.1  |
| 21.6        | -3.1 | -0.9   | 1.0  | 3.4   | 7.6   | 12.8  | 18.3  | 23.5  | 26.8  | 29.8    | 33.3  |
| 21.8        | -3.0 | -0.8   | 1.1  | 3.5   | 7.7   | 12.9  | 18.4  | 23.7  | 27.0  | 29.9    | 33.4  |

| Table G. Body height-related reference intervals (RIs) for central (aortic) augmentation index (cAIx) for males (n=576) |       |        |       |       |       |       |       |       |         |       |       |
|-------------------------------------------------------------------------------------------------------------------------|-------|--------|-------|-------|-------|-------|-------|-------|---------|-------|-------|
| Body Height (cm)                                                                                                        | 1 th  | 2.5 th | 5 th  | 10 th | 25 th | 50 th | 75 th | 90 th | 97.5 th | 99 th |       |
| 104                                                                                                                     | 5.06  | 6.36   | 7.54  | 8.95  | 11.43 | 14.41 | 17.59 | 20.62 | 22.51   | 24.20 | 26.23 |
| 105                                                                                                                     | 4.79  | 6.12   | 7.32  | 8.76  | 11.31 | 14.35 | 17.62 | 20.74 | 22.69   | 24.44 | 26.52 |
| 106                                                                                                                     | 4.53  | 5.89   | 7.10  | 8.57  | 11.18 | 14.30 | 17.65 | 20.86 | 22.86   | 24.66 | 26.81 |
| 107                                                                                                                     | 4.28  | 5.65   | 6.89  | 8.39  | 11.04 | 14.24 | 17.67 | 20.96 | 23.02   | 24.87 | 27.08 |
| 108                                                                                                                     | 4.03  | 5.42   | 6.68  | 8.20  | 10.91 | 14.17 | 17.69 | 21.06 | 23.18   | 25.07 | 27.34 |
| 109                                                                                                                     | 3.78  | 5.19   | 6.47  | 8.02  | 10.77 | 14.10 | 17.70 | 21.15 | 23.32   | 25.26 | 27.59 |
| 110                                                                                                                     | 3.54  | 4.97   | 6.26  | 7.83  | 10.64 | 14.03 | 17.70 | 21.23 | 23.45   | 25.44 | 27.83 |
| 111                                                                                                                     | 3.30  | 4.74   | 6.05  | 7.65  | 10.50 | 13.95 | 17.70 | 21.30 | 23.57   | 25.61 | 28.06 |
| 112                                                                                                                     | 3.06  | 4.52   | 5.85  | 7.46  | 10.36 | 13.87 | 17.69 | 21.37 | 23.69   | 25.77 | 28.27 |
| 113                                                                                                                     | 2.83  | 4.30   | 5.65  | 7.28  | 10.21 | 13.79 | 17.67 | 21.42 | 23.79   | 25.92 | 28.47 |
| 114                                                                                                                     | 2.60  | 4.09   | 5.44  | 7.10  | 10.07 | 13.70 | 17.65 | 21.47 | 23.89   | 26.06 | 28.67 |
| 115                                                                                                                     | 2.38  | 3.87   | 5.24  | 6.91  | 9.93  | 13.61 | 17.63 | 21.52 | 23.98   | 26.19 | 28.85 |
| 116                                                                                                                     | 2.16  | 3.66   | 5.04  | 6.73  | 9.78  | 13.51 | 17.59 | 21.55 | 24.05   | 26.31 | 29.02 |
| 117                                                                                                                     | 1.94  | 3.46   | 4.85  | 6.55  | 9.63  | 13.41 | 17.56 | 21.58 | 24.12   | 26.42 | 29.18 |
| 118                                                                                                                     | 1.73  | 3.25   | 4.65  | 6.37  | 9.48  | 13.31 | 17.51 | 21.60 | 24.19   | 26.52 | 29.33 |
| 119                                                                                                                     | 1.52  | 3.05   | 4.46  | 6.19  | 9.33  | 13.21 | 17.47 | 21.61 | 24.24   | 26.61 | 29.46 |
| 120                                                                                                                     | 1.31  | 2.85   | 4.26  | 6.01  | 9.18  | 13.10 | 17.41 | 21.61 | 24.28   | 26.69 | 29.59 |
| 121                                                                                                                     | 1.11  | 2.65   | 4.07  | 5.83  | 9.03  | 12.99 | 17.35 | 21.61 | 24.32   | 26.76 | 29.71 |
| 122                                                                                                                     | 0.91  | 2.45   | 3.88  | 5.65  | 8.88  | 12.87 | 17.29 | 21.61 | 24.35   | 26.83 | 29.82 |
| 123                                                                                                                     | 0.71  | 2.26   | 3.70  | 5.47  | 8.72  | 12.76 | 17.22 | 21.59 | 24.37   | 26.88 | 29.91 |
| 124                                                                                                                     | 0.52  | 2.07   | 3.51  | 5.30  | 8.57  | 12.64 | 17.15 | 21.57 | 24.38   | 26.93 | 30.00 |
| 125                                                                                                                     | 0.33  | 1.88   | 3.33  | 5.12  | 8.41  | 12.52 | 17.07 | 21.54 | 24.39   | 26.96 | 30.08 |
| 126                                                                                                                     | 0.14  | 1.69   | 3.14  | 4.94  | 8.26  | 12.39 | 16.99 | 21.51 | 24.39   | 26.99 | 30.14 |
| 127                                                                                                                     | -0.05 | 1.51   | 2.96  | 4.77  | 8.10  | 12.27 | 16.91 | 21.47 | 24.38   | 27.01 | 30.20 |
| 128                                                                                                                     | -0.23 | 1.33   | 2.78  | 4.60  | 7.94  | 12.14 | 16.82 | 21.42 | 24.36   | 27.03 | 30.25 |
| 129                                                                                                                     | -0.41 | 1.15   | 2.60  | 4.42  | 7.78  | 12.01 | 16.72 | 21.37 | 24.34   | 27.03 | 30.29 |
| 130                                                                                                                     | -0.58 | 0.97   | 2.43  | 4.25  | 7.62  | 11.87 | 16.62 | 21.31 | 24.31   | 27.03 | 30.32 |
| 131                                                                                                                     | -0.75 | 0.79   | 2.25  | 4.08  | 7.46  | 11.73 | 16.52 | 21.25 | 24.27   | 27.01 | 30.34 |
| 132                                                                                                                     | -0.92 | 0.62   | 2.08  | 3.91  | 7.30  | 11.60 | 16.41 | 21.18 | 24.23   | 27.00 | 30.35 |
| 133                                                                                                                     | -1.09 | 0.45   | 1.91  | 3.74  | 7.14  | 11.46 | 16.30 | 21.10 | 24.18   | 26.97 | 30.35 |
| 134                                                                                                                     | -1.25 | 0.28   | 1.74  | 3.57  | 6.98  | 11.31 | 16.19 | 21.02 | 24.12   | 26.93 | 30.35 |
| 135                                                                                                                     | -1.41 | 0.11   | 1.57  | 3.40  | 6.82  | 11.17 | 16.07 | 20.93 | 24.06   | 26.89 | 30.33 |
| 136                                                                                                                     | -1.57 | -0.05  | 1.40  | 3.23  | 6.66  | 11.02 | 15.95 | 20.84 | 23.99   | 26.84 | 30.31 |
| 137                                                                                                                     | -1.73 | -0.21  | 1.23  | 3.06  | 6.50  | 10.87 | 15.82 | 20.75 | 23.91   | 26.79 | 30.28 |
| 138                                                                                                                     | -1.88 | -0.37  | 1.07  | 2.90  | 6.33  | 10.72 | 15.70 | 20.64 | 23.83   | 26.72 | 30.24 |
| 139                                                                                                                     | -2.03 | -0.53  | 0.91  | 2.73  | 6.17  | 10.57 | 15.56 | 20.54 | 23.74   | 26.65 | 30.19 |
| 140                                                                                                                     | -2.18 | -0.69  | 0.75  | 2.57  | 6.01  | 10.42 | 15.43 | 20.43 | 23.65   | 26.58 | 30.14 |
| 141                                                                                                                     | -2.32 | -0.84  | 0.59  | 2.41  | 5.84  | 10.26 | 15.29 | 20.31 | 23.55   | 26.49 | 30.08 |
| 142                                                                                                                     | -2.47 | -0.99  | 0.43  | 2.24  | 5.68  | 10.11 | 15.15 | 20.19 | 23.44   | 26.40 | 30.01 |
| 143                                                                                                                     | -2.61 | -1.14  | 0.27  | 2.08  | 5.52  | 9.95  | 15.00 | 20.06 | 23.33   | 26.31 | 29.93 |
| 144                                                                                                                     | -2.74 | -1.29  | 0.12  | 1.92  | 5.35  | 9.79  | 14.86 | 19.93 | 23.21   | 26.20 | 29.84 |
| 145                                                                                                                     | -2.88 | -1.44  | -0.03 | 1.76  | 5.19  | 9.63  | 14.71 | 19.80 | 23.09   | 26.09 | 29.75 |
| 146                                                                                                                     | -3.01 | -1.58  | -0.19 | 1.61  | 5.03  | 9.47  | 14.55 | 19.66 | 22.97   | 25.98 | 29.65 |
| 147                                                                                                                     | -3.14 | -1.72  | -0.33 | 1.45  | 4.86  | 9.30  | 14.40 | 19.52 | 22.83   | 25.86 | 29.54 |
| 148                                                                                                                     | -3.27 | -1.86  | -0.48 | 1.29  | 4.70  | 9.14  | 14.24 | 19.37 | 22.70   | 25.73 | 29.43 |
| 149                                                                                                                     | -3.39 | -2.00  | -0.63 | 1.14  | 4.54  | 8.97  | 14.08 | 19.22 | 22.55   | 25.60 | 29.31 |
| 150                                                                                                                     | -3.51 | -2.13  | -0.77 | 0.99  | 4.37  | 8.81  | 13.91 | 19.07 | 22.41   | 25.46 | 29.18 |
| 151                                                                                                                     | -3.63 | -2.27  | -0.92 | 0.83  | 4.21  | 8.64  | 13.75 | 18.91 | 22.26   | 25.32 | 29.05 |
| 152                                                                                                                     | -3.75 | -2.40  | -1.06 | 0.68  | 4.05  | 8.47  | 13.58 | 18.75 | 22.10   | 25.17 | 28.91 |
| 153                                                                                                                     | -3.87 | -2.53  | -1.20 | 0.53  | 3.89  | 8.30  | 13.41 | 18.58 | 21.94   | 25.01 | 28.77 |
| 154                                                                                                                     | -3.98 | -2.66  | -1.34 | 0.38  | 3.72  | 8.13  | 13.24 | 18.41 | 21.77   | 24.85 | 28.61 |
| 155                                                                                                                     | -4.09 | -2.78  | -1.48 | 0.23  | 3.56  | 7.96  | 13.06 | 18.24 | 21.61   | 24.69 | 28.46 |
| 156                                                                                                                     | -4.20 | -2.91  | -1.61 | 0.09  | 3.40  | 7.78  | 12.89 | 18.06 | 21.43   | 24.52 | 28.29 |
| 157                                                                                                                     | -4.30 | -3.03  | -1.74 | -0.06 | 3.24  | 7.61  | 12.71 | 17.88 | 21.26   | 24.34 | 28.12 |
| 158                                                                                                                     | -4.41 | -3.15  | -1.88 | -0.20 | 3.08  | 7.44  | 12.53 | 17.70 | 21.07   | 24.16 | 27.95 |
| 159                                                                                                                     | -4.51 | -3.27  | -2.01 | -0.35 | 2.92  | 7.26  | 12.34 | 17.51 | 20.89   | 23.98 | 27.77 |
| 160                                                                                                                     | -4.61 | -3.38  | -2.14 | -0.49 | 2.76  | 7.09  | 12.16 | 17.33 | 20.70   | 23.79 | 27.58 |
| 161                                                                                                                     | -4.71 | -3.50  | -2.26 | -0.63 | 2.60  | 6.91  | 11.97 | 17.14 | 20.51   | 23.60 | 27.39 |
| 162                                                                                                                     | -4.80 | -3.61  | -2.39 | -0.77 | 2.44  | 6.74  | 11.79 | 16.94 | 20.31   | 23.40 | 27.19 |
| 163                                                                                                                     | -4.89 | -3.72  | -2.51 | -0.91 | 2.28  | 6.56  | 11.60 | 16.74 | 20.11   | 23.20 | 26.99 |
| 164                                                                                                                     | -4.99 | -3.83  | -2.64 | -1.04 | 2.12  | 6.38  | 11.41 | 16.54 | 19.91   | 23.00 | 26.78 |
| 165                                                                                                                     | -5.07 | -3.93  | -2.76 | -1.18 | 1.96  | 6.21  | 11.21 | 16.34 | 19.70   | 22.79 | 26.57 |
| 166                                                                                                                     | -5.16 | -4.04  | -2.88 | -1.31 | 1.81  | 6.03  | 11.02 | 16.14 | 19.49   | 22.57 | 26.35 |
| 167                                                                                                                     | -5.24 | -4.14  | -2.99 | -1.45 | 1.65  | 5.85  | 10.83 | 15.93 | 19.28   | 22.36 | 26.13 |
| 168                                                                                                                     | -5.33 | -4.24  | -3.11 | -1.58 | 1.50  | 5.68  | 10.63 | 15.72 | 19.06   | 22.14 | 25.91 |
| 169                                                                                                                     | -5.41 | -4.34  | -3.22 | -1.71 | 1.34  | 5.50  | 10.43 | 15.51 | 18.84   | 21.91 | 25.68 |
| 170                                                                                                                     | -5.49 | -4.44  | -3.34 | -1.84 | 1.19  | 5.32  | 10.23 | 15.30 | 18.62   | 21.68 | 25.44 |
| 171                                                                                                                     | -5.56 | -4.54  | -3.45 | -1.97 | 1.03  | 5.14  | 10.03 | 15.08 | 18.40   | 21.45 | 25.21 |
| 172                                                                                                                     | -5.64 | -4.63  | -3.56 | -2.09 | 0.88  | 4.96  | 9.83  | 14.86 | 18.17   | 21.22 | 24.96 |
| 173                                                                                                                     | -5.71 | -4.72  | -3.67 | -2.22 | 0.73  | 4.78  | 9.63  | 14.64 | 17.94   | 20.98 | 24.72 |
| 174                                                                                                                     | -5.78 | -4.81  | -3.77 | -2.34 | 0.58  | 4.61  | 9.43  | 14.42 | 17.71   | 20.74 | 24.47 |
| 175                                                                                                                     | -5.85 | -4.90  | -3.88 | -2.47 | 0.43  | 4.43  | 9.23  | 14.20 | 17.47   | 20.50 | 24.21 |
| 176                                                                                                                     | -5.91 | -4.99  | -3.98 | -2.59 | 0.28  | 4.25  | 9.02  | 13.97 | 17.24   | 20.25 | 23.96 |
| 177                                                                                                                     | -5.98 | -5.07  | -4.08 | -2.71 | 0.13  | 4.07  | 8.82  | 13.75 | 17.00   | 20.00 | 23.70 |
| 178                                                                                                                     | -6.04 | -5.15  | -4.18 | -2.83 | -0.02 | 3.90  | 8.61  | 13.52 | 16.76   | 19.75 | 23.43 |
| 179                                                                                                                     | -6.10 | -5.23  | -4.28 | -2.94 | -0.16 | 3.72  | 8.41  | 13.29 | 16.51   | 19.49 | 23.16 |
| 180                                                                                                                     | -6.16 | -5.31  | -4.38 | -3.06 | -0.31 | 3.54  | 8.20  | 13.06 | 16.27   | 19.24 | 22.89 |
| 181                                                                                                                     | -6.21 | -5.39  | -4.47 | -3.17 | -0.45 | 3.36  | 8.00  | 12.82 | 16.02   | 18.98 | 22.62 |
| 182                                                                                                                     | -6.27 | -5.47  | -4.56 | -3.28 | -0.60 | 3.19  | 7.79  | 12.59 | 15.77   | 18.71 | 22.34 |
| 183                                                                                                                     | -6.32 | -5.54  | -4.66 | -3.40 | -0.74 | 3.01  | 7.58  | 12.36 | 15.52   | 18.45 | 22.06 |
| 184                                                                                                                     | -6.37 | -5.61  | -4.75 | -3.51 | -0.88 | 2.84  | 7.37  | 12.12 | 15.27   | 18.18 | 21.78 |
| 185                                                                                                                     | -6.42 | -5.68  | -4.83 | -3.61 | -1.02 | 2.66  | 7.16  | 11.88 | 15.02   | 17.91 | 21.50 |
| 186                                                                                                                     | -6.46 | -5.75  | -4.92 | -3.72 | -1.16 | 2.49  | 6.96  | 11.64 | 14.76   | 17.64 | 21.21 |
| 187                                                                                                                     | -6.51 | -5.82  | -5.00 | -3.83 | -1.30 | 2.31  | 6.75  | 11.41 | 14.50   | 17.37 | 20.92 |
| 188                                                                                                                     | -6.55 | -5.88  | -5.09 | -3.93 | -1.44 | 2.14  | 6.54  | 11.17 | 14.24   | 17.10 | 20.62 |
| 189                                                                                                                     | -6.59 | -5.95  | -5.17 | -4.03 | -1.57 | 1.97  | 6.33  | 10.93 | 13.98   | 16.82 | 20.33 |
| 190                                                                                                                     | -6.63 | -6.01  | -5.25 | -4.13 | -1.71 | 1.80  | 6.12  | 10.68 | 13.72   | 16.54 | 20.03 |
| 191                                                                                                                     | -6.67 | -6.07  | -5.33 | -4.23 | -1.84 | 1.62  | 5.91  | 10.44 | 13.46   | 16.26 | 19.73 |

**Table H. Body height-related reference intervals (RIs) for central (aortic) augmentation index (cAIx) for females (n=462)**

| Body Height (cm) | 1 th  | 2.5 th | 5 th  | 10 th | 25 th | 50 th | 75 th | 90 th | 95 th | 97.5 th | 99 th |
|------------------|-------|--------|-------|-------|-------|-------|-------|-------|-------|---------|-------|
| 102              | -1.63 | 1.21   | 3.82  | 7.03  | 12.82 | 19.86 | 27.47 | 34.76 | 39.32 | 43.40   | 48.27 |
| 103              | -1.43 | 1.39   | 3.98  | 7.17  | 12.89 | 19.85 | 27.38 | 34.57 | 39.08 | 43.10   | 47.91 |
| 104              | -1.25 | 1.55   | 4.13  | 7.29  | 12.96 | 19.85 | 27.28 | 34.39 | 38.84 | 42.81   | 47.55 |
| 105              | -1.07 | 1.71   | 4.27  | 7.40  | 13.02 | 19.83 | 27.18 | 34.20 | 38.60 | 42.52   | 47.20 |
| 106              | -0.91 | 1.86   | 4.40  | 7.50  | 13.06 | 19.81 | 27.08 | 34.02 | 38.36 | 42.23   | 46.85 |
| 107              | -0.75 | 1.99   | 4.51  | 7.59  | 13.10 | 19.78 | 26.97 | 33.83 | 38.12 | 41.94   | 46.51 |
| 108              | -0.61 | 2.12   | 4.62  | 7.67  | 13.13 | 19.74 | 26.85 | 33.64 | 37.88 | 41.66   | 46.17 |
| 109              | -0.48 | 2.23   | 4.72  | 7.74  | 13.16 | 19.70 | 26.73 | 33.44 | 37.64 | 41.38   | 45.84 |
| 110              | -0.36 | 2.34   | 4.80  | 7.80  | 13.17 | 19.65 | 26.61 | 33.25 | 37.40 | 41.09   | 45.50 |
| 111              | -0.24 | 2.43   | 4.88  | 7.86  | 13.18 | 19.59 | 26.49 | 33.06 | 37.16 | 40.81   | 45.18 |
| 112              | -0.14 | 2.52   | 4.95  | 7.90  | 13.17 | 19.53 | 26.36 | 32.86 | 36.92 | 40.54   | 44.85 |
| 113              | -0.05 | 2.59   | 5.00  | 7.93  | 13.16 | 19.46 | 26.22 | 32.66 | 36.68 | 40.26   | 44.53 |
| 114              | 0.03  | 2.66   | 5.05  | 7.96  | 13.15 | 19.39 | 26.09 | 32.46 | 36.44 | 39.98   | 44.21 |
| 115              | 0.10  | 2.71   | 5.09  | 7.98  | 13.12 | 19.31 | 25.95 | 32.26 | 36.20 | 39.71   | 43.89 |
| 116              | 0.17  | 2.76   | 5.12  | 7.98  | 13.09 | 19.22 | 25.80 | 32.06 | 35.96 | 39.44   | 43.58 |
| 117              | 0.22  | 2.79   | 5.14  | 7.98  | 13.05 | 19.13 | 25.66 | 31.86 | 35.72 | 39.17   | 43.27 |
| 118              | 0.26  | 2.82   | 5.15  | 7.97  | 13.00 | 19.04 | 25.50 | 31.65 | 35.49 | 38.90   | 42.97 |
| 119              | 0.30  | 2.84   | 5.15  | 7.96  | 12.95 | 18.94 | 25.35 | 31.45 | 35.25 | 38.63   | 42.66 |
| 120              | 0.32  | 2.85   | 5.15  | 7.93  | 12.88 | 18.83 | 25.19 | 31.24 | 35.01 | 38.37   | 42.36 |
| 121              | 0.34  | 2.85   | 5.13  | 7.90  | 12.82 | 18.72 | 25.03 | 31.03 | 34.77 | 38.10   | 42.07 |
| 122              | 0.34  | 2.84   | 5.11  | 7.86  | 12.74 | 18.60 | 24.87 | 30.82 | 34.53 | 37.84   | 41.77 |
| 123              | 0.34  | 2.82   | 5.08  | 7.81  | 12.66 | 18.48 | 24.70 | 30.61 | 34.30 | 37.58   | 41.48 |
| 124              | 0.33  | 2.80   | 5.04  | 7.75  | 12.57 | 18.35 | 24.53 | 30.40 | 34.06 | 37.31   | 41.19 |
| 125              | 0.31  | 2.76   | 4.99  | 7.69  | 12.48 | 18.22 | 24.36 | 30.19 | 33.82 | 37.06   | 40.91 |
| 126              | 0.28  | 2.72   | 4.94  | 7.62  | 12.38 | 18.08 | 24.19 | 29.98 | 33.59 | 36.80   | 40.62 |
| 127              | 0.25  | 2.67   | 4.87  | 7.54  | 12.27 | 17.94 | 24.01 | 29.76 | 33.35 | 36.54   | 40.34 |
| 128              | 0.20  | 2.61   | 4.80  | 7.45  | 12.16 | 17.80 | 23.83 | 29.55 | 33.11 | 36.29   | 40.07 |
| 129              | 0.15  | 2.55   | 4.73  | 7.36  | 12.04 | 17.65 | 23.64 | 29.33 | 32.88 | 36.03   | 39.79 |
| 130              | 0.09  | 2.48   | 4.64  | 7.26  | 11.92 | 17.50 | 23.46 | 29.12 | 32.64 | 35.78   | 39.52 |
| 131              | 0.02  | 2.40   | 4.55  | 7.16  | 11.79 | 17.34 | 23.27 | 28.90 | 32.41 | 35.53   | 39.25 |
| 132              | -0.05 | 2.31   | 4.45  | 7.05  | 11.66 | 17.18 | 23.08 | 28.68 | 32.17 | 35.28   | 38.98 |
| 133              | -0.13 | 2.22   | 4.35  | 6.93  | 11.52 | 17.01 | 22.89 | 28.46 | 31.94 | 35.03   | 38.71 |
| 134              | -0.22 | 2.11   | 4.24  | 6.81  | 11.37 | 16.84 | 22.69 | 28.24 | 31.70 | 34.78   | 38.45 |
| 135              | -0.32 | 2.01   | 4.12  | 6.68  | 11.22 | 16.67 | 22.49 | 28.02 | 31.47 | 34.53   | 38.19 |
| 136              | -0.42 | 1.89   | 4.00  | 6.54  | 11.07 | 16.49 | 22.29 | 27.80 | 31.23 | 34.29   | 37.93 |
| 137              | -0.53 | 1.77   | 3.87  | 6.40  | 10.91 | 16.31 | 22.09 | 27.58 | 31.00 | 34.04   | 37.67 |
| 138              | -0.65 | 1.65   | 3.73  | 6.26  | 10.74 | 16.13 | 21.89 | 27.36 | 30.77 | 33.80   | 37.42 |
| 139              | -0.77 | 1.51   | 3.59  | 6.10  | 10.57 | 15.94 | 21.68 | 27.13 | 30.53 | 33.56   | 37.16 |
| 140              | -0.90 | 1.37   | 3.44  | 5.95  | 10.40 | 15.75 | 21.47 | 26.91 | 30.30 | 33.32   | 36.91 |
| 141              | -1.03 | 1.23   | 3.29  | 5.78  | 10.22 | 15.55 | 21.26 | 26.69 | 30.07 | 33.08   | 36.67 |
| 142              | -1.17 | 1.08   | 3.13  | 5.62  | 10.04 | 15.36 | 21.05 | 26.46 | 29.84 | 32.84   | 36.42 |
| 143              | -1.32 | 0.92   | 2.97  | 5.44  | 9.86  | 15.16 | 20.84 | 26.24 | 29.60 | 32.60   | 36.18 |
| 144              | -1.47 | 0.76   | 2.80  | 5.27  | 9.67  | 14.95 | 20.62 | 26.01 | 29.37 | 32.37   | 35.93 |
| 145              | -1.63 | 0.60   | 2.62  | 5.09  | 9.47  | 14.75 | 20.40 | 25.78 | 29.14 | 32.13   | 35.69 |
| 146              | -1.79 | 0.43   | 2.45  | 4.90  | 9.27  | 14.54 | 20.18 | 25.56 | 28.91 | 31.90   | 35.46 |
| 147              | -1.96 | 0.25   | 2.26  | 4.71  | 9.07  | 14.33 | 19.96 | 25.33 | 28.68 | 31.66   | 35.22 |
| 148              | -2.13 | 0.07   | 2.08  | 4.51  | 8.87  | 14.11 | 19.74 | 25.10 | 28.45 | 31.43   | 34.99 |
| 149              | -2.30 | -0.12  | 1.88  | 4.31  | 8.66  | 13.89 | 19.52 | 24.87 | 28.22 | 31.20   | 34.75 |
| 150              | -2.48 | -0.30  | 1.69  | 4.11  | 8.45  | 13.67 | 19.29 | 24.64 | 27.99 | 30.97   | 34.52 |
| 151              | -2.67 | -0.50  | 1.49  | 3.91  | 8.23  | 13.45 | 19.06 | 24.41 | 27.76 | 30.74   | 34.29 |
| 152              | -2.85 | -0.69  | 1.28  | 3.70  | 8.01  | 13.23 | 18.84 | 24.19 | 27.53 | 30.51   | 34.07 |
| 153              | -3.05 | -0.90  | 1.08  | 3.48  | 7.79  | 13.00 | 18.61 | 23.96 | 27.30 | 30.28   | 33.84 |
| 154              | -3.24 | -1.10  | 0.86  | 3.26  | 7.56  | 12.77 | 18.37 | 23.73 | 27.07 | 30.06   | 33.62 |
| 155              | -3.44 | -1.31  | 0.65  | 3.04  | 7.34  | 12.54 | 18.14 | 23.49 | 26.84 | 29.83   | 33.40 |
| 156              | -3.64 | -1.52  | 0.43  | 2.82  | 7.11  | 12.30 | 17.91 | 23.26 | 26.62 | 29.61   | 33.18 |
| 157              | -3.85 | -1.73  | 0.21  | 2.59  | 6.87  | 12.07 | 17.67 | 23.03 | 26.39 | 29.38   | 32.96 |
| 158              | -4.06 | -1.95  | -0.01 | 2.36  | 6.64  | 11.83 | 17.44 | 22.80 | 26.16 | 29.16   | 32.74 |
| 159              | -4.27 | -2.17  | -0.24 | 2.13  | 6.40  | 11.59 | 17.20 | 22.57 | 25.93 | 28.94   | 32.53 |
| 160              | -4.48 | -2.40  | -0.47 | 1.89  | 6.16  | 11.35 | 16.96 | 22.34 | 25.71 | 28.72   | 32.31 |
| 161              | -4.69 | -2.62  | -0.70 | 1.65  | 5.91  | 11.10 | 16.72 | 22.11 | 25.48 | 28.50   | 32.10 |
| 162              | -4.91 | -2.85  | -0.94 | 1.41  | 5.67  | 10.86 | 16.48 | 21.87 | 25.26 | 28.28   | 31.89 |
| 163              | -5.13 | -3.08  | -1.18 | 1.17  | 5.42  | 10.61 | 16.24 | 21.64 | 25.03 | 28.06   | 31.68 |
| 164              | -5.35 | -3.31  | -1.41 | 0.93  | 5.17  | 10.36 | 16.00 | 21.41 | 24.81 | 27.84   | 31.47 |
| 165              | -5.57 | -3.55  | -1.66 | 0.68  | 4.92  | 10.11 | 15.75 | 21.18 | 24.58 | 27.63   | 31.27 |
| 166              | -5.80 | -3.78  | -1.90 | 0.43  | 4.66  | 9.86  | 15.51 | 20.94 | 24.36 | 27.41   | 31.06 |
| 167              | -6.02 | -4.02  | -2.14 | 0.18  | 4.41  | 9.60  | 15.26 | 20.71 | 24.13 | 27.20   | 30.86 |
| 168              | -6.25 | -4.26  | -2.39 | -0.07 | 4.15  | 9.35  | 15.02 | 20.48 | 23.91 | 26.98   | 30.66 |
| 169              | -6.47 | -4.50  | -2.64 | -0.33 | 3.89  | 9.09  | 14.77 | 20.24 | 23.69 | 26.77   | 30.46 |
| 170              | -6.70 | -4.74  | -2.89 | -0.58 | 3.63  | 8.83  | 14.52 | 20.01 | 23.46 | 26.56   | 30.26 |
| 171              | -6.93 | -4.98  | -3.14 | -0.84 | 3.37  | 8.58  | 14.27 | 19.78 | 23.24 | 26.35   | 30.06 |
| 172              | -7.15 | -5.22  | -3.39 | -1.10 | 3.11  | 8.32  | 14.03 | 19.54 | 23.02 | 26.13   | 29.87 |
| 173              | -7.38 | -5.46  | -3.64 | -1.36 | 2.84  | 8.05  | 13.78 | 19.31 | 22.80 | 25.92   | 29.67 |
| 174              | -7.60 | -5.70  | -3.89 | -1.62 | 2.58  | 7.79  | 13.53 | 19.08 | 22.58 | 25.72   | 29.48 |
| 175              | -7.83 | -5.95  | -4.15 | -1.88 | 2.31  | 7.53  | 13.28 | 18.84 | 22.36 | 25.51   | 29.29 |
| 176              | -8.05 | -6.19  | -4.40 | -2.14 | 2.04  | 7.27  | 13.02 | 18.61 | 22.14 | 25.30   | 29.10 |
| 177              | -8.27 | -6.43  | -4.65 | -2.40 | 1.77  | 7.00  | 12.77 | 18.38 | 21.92 | 25.09   | 28.91 |
| 178              | -8.49 | -6.67  | -4.90 | -2.67 | 1.50  | 6.74  | 12.52 | 18.14 | 21.70 | 24.89   | 28.72 |
